# Supplementary material for: Post-authorisation passive enhanced safety surveillance of seasonal influenza vaccines: protocol of a pilot study in England
Source: PubMed Central journal article supplement — BMJ Open. 2017 May 17;7(5):e015469. doi: 10.1136/bmjopen-2016-015469 (PMC5541341; doi:10.1136/bmjopen-2016-015469), 2017-05-17
Supplement: bmjopen-2016-015469.draft_revisions.pdf [file bmjopen-2016-015469.draft_revisions.pdf]

# BMJ Open

## Post-authorisation passive enhanced safety surveillance of seasonal influenza vaccines: Pilot study in England

|                                 |                                                                                                                                                                                                                                                                                                                                                                                                                                                                                                                                                                                                                                                                                                                                                |
|---------------------------------|------------------------------------------------------------------------------------------------------------------------------------------------------------------------------------------------------------------------------------------------------------------------------------------------------------------------------------------------------------------------------------------------------------------------------------------------------------------------------------------------------------------------------------------------------------------------------------------------------------------------------------------------------------------------------------------------------------------------------------------------|
| Journal:                        | <i>BMJ Open</i>                                                                                                                                                                                                                                                                                                                                                                                                                                                                                                                                                                                                                                                                                                                                |
| Manuscript ID                   | bmjopen-2016-015469                                                                                                                                                                                                                                                                                                                                                                                                                                                                                                                                                                                                                                                                                                                            |
| Article Type:                   | Protocol                                                                                                                                                                                                                                                                                                                                                                                                                                                                                                                                                                                                                                                                                                                                       |
| Date Submitted by the Author:   | 12-Dec-2016                                                                                                                                                                                                                                                                                                                                                                                                                                                                                                                                                                                                                                                                                                                                    |
| Complete List of Authors:       | de Lusignan, Simon; University of Surrey, Department of Clinical and Experimental Medicine<br>Dos Santos, Gaël; GlaxoSmithKline Vaccines<br>Correa, Ana; University of Surrey, Department of Clinical and Experimental Medicine<br>Haguinet, François; GlaxoSmithKline Vaccines<br>Yonova, Ivelina; University of Surrey, Department of Clinical and Experimental Medicine<br>Lair, Florence; GlaxoSmithKline Vaccines<br>Byford, Rachel; University of Surrey, Department of Clinical and Experimental Medicine<br>Ferreira, Filipa; University of Surrey, Department of Clinical and Experimental Medicine<br>Stuttard, Karen; GlaxoSmithKline Vaccines<br>Chan, Tom; University of Surrey, Department of Clinical and Experimental Medicine |
| <b>Primary Subject Heading</b>: | Epidemiology                                                                                                                                                                                                                                                                                                                                                                                                                                                                                                                                                                                                                                                                                                                                   |
| Secondary Subject Heading:      | General practice / Family practice, Infectious diseases, Epidemiology, Research methods, Health policy                                                                                                                                                                                                                                                                                                                                                                                                                                                                                                                                                                                                                                         |
| Keywords:                       | EPIDEMIOLGY, Public health < INFECTIOUS DISEASES, BIOTECHNOLOGY & BIOINFORMATICS, PREVENTIVE MEDICINE, PRIMARY CARE, Adverse events < THERAPEUTICS                                                                                                                                                                                                                                                                                                                                                                                                                                                                                                                                                                                             |
|                                 |                                                                                                                                                                                                                                                                                                                                                                                                                                                                                                                                                                                                                                                                                                                                                |

SCHOLARONE™  
Manuscripts

**Post-authorisation passive enhanced safety surveillance of seasonal influenza vaccines:  
Pilot study in England**

**Simon de Lusignan**

(Principal Investigator)\*<sup>1</sup>

Professor of Primary Care and Clinical Informatics

Chair in Health Care Management,

University of Surrey

[s.lusignan@surrey.ac.uk](mailto:s.lusignan@surrey.ac.uk)

+44 0 1483 684802

**Gaël Dos Santos**

Epidemiologist, Global Epidemiology<sup>2</sup>

GAEL.X.DOS-SANTOS@GSK.COM

**Ana Correa**

Primary Care Scientist<sup>1</sup>

Department of Clinical and Experimental Medicine, University of Surrey

a.correa@surrey.ac.uk

**François Haguet**

Bio-Statistician, Global Epidemiology<sup>2</sup>

FRANCOIS.F.HAGUINET@GSK.COM

**Ivelina Yonova**

Practice Liaison Officer<sup>1</sup>

Department of Clinical and Experimental Medicine, University of Surrey

i.yonova@surrey.ac.uk

**Florence Lair**

Study Delivery Lead<sup>2</sup>

FLORENCE.X.LAIR@GSK.COM

**Rachel Byford**

Senior Database Developer<sup>1</sup>

Department of Clinical and Experimental Medicine, University of Surrey

r.byford@surrey.ac.uk

**Filipa Ferreira**

Programme Manager<sup>1</sup>

Department of Clinical and Experimental Medicine, University of Surrey

f.ferreira@surrey.ac.uk

**Karen Stuttard**Local Delivery Lead<sup>2</sup>

KAREN.E.STUTTARD@GSK.COM

**Tom Chan**Senior Research Fellow<sup>1</sup>

Department of Clinical and Experimental Medicine, University of Surrey

t.chan@surrey.ac.uk

<sup>1</sup>Department of Clinical and Experimental Medicine

University of Surrey

Guildford

Surrey GU2 7XH

UK

W: [www.clininf.eu](http://www.clininf.eu)<sup>2</sup>GSK Vaccines

Rue de l'Institut 89

1330 Rixensart

Belgium

Word count: 3938

1  
2  
3  
4 **Post-authorisation passive enhanced safety surveillance of seasonal influenza vaccines:**  
5 **Pilot study in England**  
6

7  
8 **ABSTRACT**  
9

10  
11 **Aim:**

12 To pilot enhanced safety surveillance of seasonal influenza vaccine meeting the European  
13 Medicines Agency (EMA) requirement to rapidly detect a significant increase in the frequency  
14 or severity of expected reactions. These local, systemic or allergic reaction are termed Adverse  
15 Events of Interest (AEI)) by EMA and may indicate risk from the new season's vaccine.  
16  
17

18  
19 *Study design:* A prospective passive enhanced safety surveillance combining data collection  
20 from adverse drug reaction (ADR) cards with automated collection of pseudonymised routinely  
21 collected electronic health record (EHR) data. This study builds on a feasibility study carried out  
22 at the start of the 2015/2016 flu season. We will report flu vaccine exposure and any AEs  
23 reported via ADR card or recorded directly into the EHR; from the commencement of influenza  
24 vaccination and ends as specified by EMA (30<sup>th</sup> November 2016).  
25  
26

27  
28 *Setting:* 10 volunteer English general practices, primarily using the GSK influenza vaccines.  
29 They had selected this vaccine in advance of the study.  
30  
31

32 *Participants:* People who receive a GSK brand influenza vaccine. At least 100 vaccinees in each  
33 age-group defined in EMA interim guidance: 6months to 5years; 6-12 years; 13-17 years; 18-64  
34 years; and ≥65years old.  
35  
36

37  
38 *Outcome measures:*

39 The primary outcome measure is the rate of AEs occurring within 7 days post-vaccination.  
40 The secondary outcome measures are: (1) Weekly analysis of influenza vaccination and uptake  
41 by different age and by at-risk group. In the UK the Chief Medical Officer (CMO) specifies  
42 those at high risk from flu, predominantly older people and those with chronic conditions. (2)  
43 As many of the AEs are common conditions, we will simultaneously report AEs rates in the  
44 unvaccinated population, calling these illness-disease episodes (IDE). (3) Any difference in our  
45 practice population profile and representative national data.  
46  
47  
48

49  
50 We will produce an interim analysis within eight weeks, and an end of study report.  
51  
52  
53  
54  
55  
56  
57  
58  
59  
60

## STRENGTHS AND LIMITATIONS

### *Strengths*

- This study sets out the first methods for near real time enhanced passive surveillance of seasonal influenza vaccine using routinely collected data.
- The methods outlined in this study have the potential to be expanded to other brands.
- The practice recruitment is intended to have wide and representative coverage of England.
- The data of the participating patients will be thoroughly protected by means of a pseudonymising algorithm.

### *Limitations*

- As we are still exploring feasibility, this study has not been powered to detect significant statistical differences of adverse event rates across brands.
- We are continuing to explore the feasibility of using rates of adverse events in non-vaccinated patients to establish a baseline for comparison.

## INTRODUCTION

### *EMA guidance*

In response to a recent expansion of national vaccination programmes in EU member states, the European Medicines Agency has released interim guidance on enhanced safety surveillance for seasonal influenza vaccines in the EU<sup>i</sup>. This set out new standards for surveillance that all Marketing Authorisation Holders (MAHs) providing vaccines in the EU must address. The key objective of the EMA enhanced safety surveillance is to rapidly detect a significant increase in the frequency and/or severity of expected reactions (local, systemic or allergic reactions) that may indicate a potential or more serious risk, as exposure to the vaccine increases.

Since 2015, European regulatory requirements to evaluate the safety and immunogenicity of seasonal influenza vaccines in small scale clinical trials were withdrawn<sup>ii</sup>. Such trials had insufficient power to adequately evaluate safety concerns arising from annual formulation changes (e.g. adverse events occurring at a rate of 1–2%). These clinical trials are to be replaced by enhanced, preferably active, safety monitoring and vaccine effectiveness assessments.

The EMA Interim Guidance on enhanced safety surveillance for seasonal influenza vaccines in the EU suggested that there would be three options envisioned for enhanced surveillance:

- *Enhanced Active surveillance (post authorisation safety studies (PASS))*: Active follow-up

1  
2  
3  
4 of a cohort of children and adults for 7 days after immunisation for reactogenicity  
5 endpoints/adverse events.  
6

- 7 • *Enhanced Passive Surveillance*: Rapidly estimate vaccine usage and facilitate adverse  
8 drug reaction (ADR) reporting, in order to determine reporting rate as a surrogate of  
9 incidence of the adverse events of interest (AEIs).
- 10 • *Data mining* or other use of electronic health record/ computerized medical record.

11  
12  
13  
14 The present collaborative pilot study between MAH GlaxoSmithKline Biologicals (GSK) and the  
15 Clinical Informatics and Health Outcomes Research Group at the University of Surrey builds  
16 on the lessons learned from the pilot study (EPI-FLU-045 VS UK) implemented during the  
17 2014/2015 influenza season and aims to address the EMA commitment for enhanced safety  
18 surveillance of seasonal vaccines in Europe. We will begin data collection on September 1<sup>st</sup>,  
19 2016, and the analysis will be completed on March 31<sup>st</sup>, 2017.  
20  
21  
22

23  
24 The EPI-FLU-045 VS UK pilot study showed that the proposed surveillance setting in the UK  
25 was suitable to rapidly detect and evaluate potential new safety concerns each influenza  
26 season. The primary purpose of the 2016/17 pilot study is to improve the combination of an  
27 ADR card-based system and the use of routine data to collect adverse events following  
28 vaccination with seasonal influenza vaccines.  
29  
30

### 31 *The RCGP RSC network*

32  
33 The Clinical Informatics Research Group, in the Department of Clinical and Experimental  
34 Medicine (DCEM) at the University of Surrey is home of the data and analysis hub for the Royal  
35 College of General Practitioners Research and Surveillance Centre (RCGP RSC). The RCGP  
36 RSC provides a national primary care surveillance system and is supported by Public Health  
37 England (PHE). The RCGP RSC network of practices has a membership designed to give  
38 representative coverage of 1.5%-2% of the English population<sup>iii</sup>. The RCGP RSC has been  
39 described as the gold standard sentinel network.  
40  
41  
42

43  
44 The most important work of the RCGP RSC network is its influenza surveillance; many practices  
45 have been involved in this work for decades<sup>iv</sup>. Data are uploaded from the network on a  
46 weekly basis to a secure sever, with the possibility to switch the frequency of the release to a  
47 twice weekly upload during epidemics. The methods developed by the University of Surrey will  
48 be used in this passive enhanced safety surveillance study, with a focus on reporting on  
49 adverse events.  
50  
51  
52

### 53 *Seasonal influenza vaccination in England*

54  
55 Seasonal influenza vaccines present several specific challenges for pharmacovigilance. These  
56 include immunisation in large population cohorts in a relatively short and fixed time period  
57  
58  
59  
60

1  
2  
3  
4 each year, and multiplicity of vaccine products on the market with the need to conduct  
5 product-specific safety surveillance. In the UK, the 2015/2016 influenza plan recommended the  
6 following groups to be vaccinated<sup>v</sup>:  
7

- 8 • People aged 65 years or over (based on age on 31 March 2016)
- 9 • People aged from 6 months to less than 65 years of age with a serious medical condition  
10 such as:
  - 11 ○ chronic (long-term) respiratory disease, such as severe asthma,
  - 12 ○ chronic obstructive pulmonary disease (COPD) or bronchitis
  - 13 ○ chronic heart disease, such as heart failure
  - 14 ○ chronic kidney disease at stage three, four or five
  - 15 ○ chronic liver disease
  - 16 ○ chronic neurological disease, such as Parkinson's disease or motor neurone
  - 17 ○ disease, or learning disability
  - 18 ○ diabetes
  - 19 ○ splenic dysfunction
  - 20 ○ a weakened immune system due to disease (such as HIV/AIDS) or
  - 21 ○ treatment (such as cancer treatment)
- 22 • All pregnant women (including those women who become pregnant during the flu season)
- 23 • All those aged two, three, and four years (but not five years or older) on 31 August
- 24 2015 (i.e., date All children of school years 1 and 2 age through locally commissioned
- 25 arrangements
- 26 • Primary school-aged children in areas that participated in primary school pilots in 2014/15
- 27 • People living in long-stay residential care homes or other long-stay care facilities.
- 28 • People who are in receipt of a carer's allowance, or those who are the main carer of an
- 29 older or disabled person.
- 30 • Household contacts of immunocompromised individuals.
- 31
- 32
- 33
- 34
- 35
- 36
- 37
- 38
- 39
- 40

41 The list above is not exhaustive, and the healthcare practitioner should apply clinical  
42 judgement to take into account the risk of flu exacerbating any underlying disease  
43

44  
45 Expansion of national vaccination has created a greater need for timely information and  
46 reassurance on the balance of risks and benefits for those receiving the vaccines. The  
47 collaborative pilot study is conceived in response to the EU requirements triggered by the  
48 EMA's call for enhanced safety surveillance in Europe. The continuation of the pilot study in  
49 the 2016/17 season will help to build a framework for passive enhanced safety surveillance in  
50 England, but will also contribute to an EU-wide programme of enhanced safety surveillance for  
51 seasonal influenza vaccines.  
52  
53  
54  
55  
56  
57  
58  
59  
60

## RESEARCH METHODS

This published protocol is a summary of the full protocol, submitted for ethical approval, the long version is available as a supplementary file.

### Objectives and endpoints

#### *Primary objective:*

- To estimate on a weekly basis the crude and cumulative incidence rate of AEs within 7 days following vaccination with a seasonal influenza vaccine, using passive surveillance of GP electronic health record (HER) systems enhanced by a card-based ADR reporting system. Extracted data will be presented overall, by brand (Fluarix Tetra vs. others), by EMA defined age strata, and CMO- specified risk groups.

#### *Primary endpoints:*

- Occurrence and onset dates of AEs within 7 days post vaccination reported using a card based ADR reporting system in vaccinated patients overall, by brand (also indicating those for whom brand data are unavailable), by age strata (6 months to 5 years; 6 to 12 years; 13 to 18 years;  $\geq 18-65$  years;  $>65$ ) and CMO-specified risk groups. AEs will be presented by categories depending of the nature of the event.
  - Fever or other febrile illness
  - Local reactions
  - General reaction (e.g., fatigue, myalgia, etc.)

### Study Design

#### *Study setting and population*

The proposed pilot study (EPI-FLU-046 VS UK) is to follow a cohort of patients who would be exposed to seasonal influenza vaccination in the months between 01/09/2016 and 30/11/2016.

Invitation letters will be sent to GP practices ordering mainly GSK's Fluarix Tetra vaccine for the 2016/17 season, and evenly representative of geographical locations and systems. Practices will be reimbursed for their involvement in this study, according to the National Institute of Health Research (NIHR) guidelines for industry sponsored studies<sup>vi</sup>.

For this pilot project, routinely collected primary care data from up to ten GP practices will be extracted, to provide passive surveillance. However, this passive surveillance is enhanced by all practices additionally using a card-based ADR reporting system. In last year's study the card-based ADR reporting system, used the Yellow Card developed by the UK Medicines and



1  
2  
3  
4 Healthcare products Regulation Agency (MHRA). We have developed a more specific ADR card,  
5 for use in this study, which will be distributed to practices.  
6  
7

8 Patients will be provided with the appropriate ADR reporting card and invited to return the  
9 card to the GP practices within 7 days, but not later than 14 days, post-vaccination<sup>vii</sup>. To  
10 protect confidentiality, this ADR card will be returned to the practice, and data from it will be  
11 recorded in that patient's EHR. The data will be used to estimate proportions of AEs among  
12 influenza-vaccinated individuals.  
13  
14

#### 15 16 17 *Inclusion criteria*

18 All patients receiving a seasonal influenza vaccine between 01/09/2016 and 30/11/2016 in one  
19 of the 10 volunteer practices are eligible for inclusion in the analysis. The main inclusion  
20 criteria for practices is that practices state their principal vaccine supplier will be GSK.  
21  
22

#### 23 24 *Exclusion criteria*

25 Patients who have explicitly opted out of data sharing will be excluded from the analysis. We  
26 will identify these patients using the opt-out codes within GP information systems where the  
27 patients have made an explicit choice to opt out; patients will be informed of their option to  
28 opt-out via posters in the practices and information sheets accompanying the ADR cards.  
29  
30

#### 31 32 *Sample size calculation*

33 The average practice size in England and Wales is 7,034<sup>viii</sup>, we estimate that data will be  
34 collected on a population of approximately 70,340 patients (across ten practices). In the period  
35 from September to December 2015, the seasonal influenza vaccine uptake for over 65 year  
36 olds was 71.0%; for those in a clinical risk group aged 6 months to 65 years old, the uptake  
37 was 45.1%; and for pregnant women, it was 42.3%. We have estimated influenza vaccine  
38 uptake using the coverage estimates published by Public Health England (PHE)<sup>ix</sup>.  
39  
40

41  
42 The minimum needed target population to be medically followed by the GPs is estimated at  
43 50,000 subjects (approximately 5,000 per practice). We expect to enrol at least 5,000  
44 vaccinated subjects with a 7 days of follow-up after vaccination (as per EMA interim guidance  
45 request). This sample size estimation sets out to estimate the probability to observe at least  
46 one AEI in the study population and evaluate the level of "certainty" around this finding; this  
47 is over the 14 week period of enhanced surveillance (01 September – 30 November 2016)  
48  
49  
50

51 We have not taken into account any effect of clustering in our surveillance study design or  
52 power calculation. Similarities, or homogeneity, between subjects in clusters reduces the  
53 variability of their responses, compared with that expected from a random sample. The  
54 cluster effect has not been taken into consideration in the calculation of the sample size.  
55  
56  
57  
58  
59  
60

It may increase the relative standard error and thus decrease the precision around the proportions presented below. Nevertheless, this will be however accounted for during the analysis.

Table 1 shows the 95% CI, the probability of observing at least one AEI during the study period in the study cohort and the relative standard error (RSE) for a range of scenarios in term of cohort size, vaccine coverage and expected probability of AEI<sup>x</sup>. With an overall sample size of a minimum of about 50,000 subjects medically followed by the enrolled GP practices, a follow-up period of 14 weeks, a vaccine coverage of 5%, 10% or 20% and an expected probability of AEI varying from 0,01% to 20%, the corresponding probability to observe at least one event in our study population varies from 2% to 100%, and the associated relative standard error varies from 2.0% to 200% depending on the scenario.

**Table 1 – Confidence intervals, Relative Standard Error and probability to observe at least one AEI according to expected probabilities of occurrence of AEI<sup>xx</sup>**

| Expected Population medically followed by the enrolled practices | Vaccine coverage | Vaccinated subjects | Subjects with events | Expected Proportion of subjects with $\geq 1$ AEI reported | Lower 95%CL | Upper 95%CL | Probability to observe $\geq 1$ AEI in the study population | Associated Relative standard error (RSE) |
|------------------------------------------------------------------|------------------|---------------------|----------------------|------------------------------------------------------------|-------------|-------------|-------------------------------------------------------------|------------------------------------------|
| 50000                                                            | 20%              | 10000               | 2000                 | 20,00%                                                     | 19,2%       | 20,8%       | 100,00%                                                     | 2,0%                                     |
| 50000                                                            | 20%              | 10000               | 1500                 | 15,00%                                                     | 14,3%       | 15,7%       | 100,00%                                                     | 2,4%                                     |
| 50000                                                            | 20%              | 10000               | 1000                 | 10,00%                                                     | 9,4%        | 10,6%       | 100,00%                                                     | 3,0%                                     |
| 50000                                                            | 20%              | 10000               | 500                  | 5,00%                                                      | 4,6%        | 5,4%        | 100,00%                                                     | 4,4%                                     |
| 50000                                                            | 20%              | 10000               | 400                  | 4,00%                                                      | 3,6%        | 4,4%        | 100,00%                                                     | 4,9%                                     |
| 50000                                                            | 20%              | 10000               | 200                  | 2,00%                                                      | 1,7%        | 2,3%        | 100,00%                                                     | 7,0%                                     |
| 50000                                                            | 20%              | 10000               | 100                  | 1,00%                                                      | 0,8%        | 1,2%        | 100,00%                                                     | 9,9%                                     |
| 50000                                                            | 20%              | 10000               | 10                   | 0,10%                                                      | 0,0%        | 0,2%        | 99,95%                                                      | 31,6%                                    |
| 50000                                                            | 20%              | 10000               | 9                    | 0,09%                                                      | 0,0%        | 0,2%        | 99,88%                                                      | 33,3%                                    |
| 50000                                                            | 20%              | 10000               | 8                    | 0,08%                                                      | 0,0%        | 0,2%        | 99,70%                                                      | 35,3%                                    |
| 50000                                                            | 20%              | 10000               | 7                    | 0,07%                                                      | 0,0%        | 0,1%        | 99,27%                                                      | 37,8%                                    |
| 50000                                                            | 20%              | 10000               | 6                    | 0,06%                                                      | 0,0%        | 0,1%        | 98,27%                                                      | 40,8%                                    |
| 50000                                                            | 20%              | 10000               | 5                    | 0,05%                                                      | 0,0%        | 0,1%        | 95,96%                                                      | 44,7%                                    |
| 50000                                                            | 20%              | 10000               | 4                    | 0,04%                                                      | 0,0%        | 0,1%        | 90,85%                                                      | 50,0%                                    |
| 50000                                                            | 20%              | 10000               | 3                    | 0,03%                                                      | 0,0%        | 0,1%        | 80,09%                                                      | 57,7%                                    |
| 50000                                                            | 20%              | 10000               | 2                    | 0,02%                                                      | 0,0%        | 0,1%        | 59,40%                                                      | 70,7%                                    |
| 50000                                                            | 20%              | 10000               | 1                    | 0,01%                                                      | 0,0%        | 0,1%        | 26,42%                                                      | 100,0%                                   |
| 50000                                                            | 10%              | 5000                | 250                  | 5,00%                                                      | 4,4%        | 5,6%        | 100,00%                                                     | 6,2%                                     |
| 50000                                                            | 10%              | 5000                | 200                  | 4,00%                                                      | 3,5%        | 4,6%        | 100,00%                                                     | 6,9%                                     |
| 50000                                                            | 10%              | 5000                | 100                  | 2,00%                                                      | 1,6%        | 2,4%        | 100,00%                                                     | 9,9%                                     |
| 50000                                                            | 10%              | 5000                | 50                   | 1,00%                                                      | 0,7%        | 1,3%        | 100,00%                                                     | 14,1%                                    |
| 50000                                                            | 10%              | 5000                | 5                    | 0,10%                                                      | 0,0%        | 0,2%        | 95,96%                                                      | 44,7%                                    |
| 50000                                                            | 10%              | 5000                | 4,5                  | 0,09%                                                      | 0,0%        | 0,2%        | 93,90%                                                      | 47,1%                                    |
| 50000                                                            | 10%              | 5000                | 4                    | 0,08%                                                      | 0,0%        | 0,2%        | 90,85%                                                      | 50,0%                                    |
| 50000                                                            | 10%              | 5000                | 3,5                  | 0,07%                                                      | 0,0%        | 0,2%        | 86,42%                                                      | 53,4%                                    |
| 50000                                                            | 10%              | 5000                | 3                    | 0,06%                                                      | 0,0%        | 0,2%        | 80,09%                                                      | 57,7%                                    |
| 50000                                                            | 10%              | 5000                | 2,5                  | 0,05%                                                      | 0,0%        | 0,2%        | 71,28%                                                      | 63,2%                                    |
| 50000                                                            | 10%              | 5000                | 2                    | 0,04%                                                      | 0,0%        | 0,1%        | 59,40%                                                      | 70,7%                                    |
| 50000                                                            | 10%              | 5000                | 1,5                  | 0,03%                                                      | 0,0%        | 0,1%        | 44,22%                                                      | 81,6%                                    |

|       |     |      |      |       |      |      |         |        |
|-------|-----|------|------|-------|------|------|---------|--------|
| 50000 | 10% | 5000 | 1    | 0,02% | 0,0% | 0,1% | 26,42%  | 100,0% |
| 50000 | 10% | 5000 | 0,5  | 0,01% | 0,0% | 0,1% | 9,02%   | 141,4% |
| 50000 | 5%  | 2500 | 125  | 5,00% | 4,2% | 5,9% | 100,00% | 8,7%   |
| 50000 | 5%  | 2500 | 100  | 4,00% | 3,3% | 4,8% | 100,00% | 9,8%   |
| 50000 | 5%  | 2500 | 50   | 2,00% | 1,5% | 2,6% | 100,00% | 14,0%  |
| 50000 | 5%  | 2500 | 25   | 1,00% | 0,6% | 1,5% | 100,00% | 19,9%  |
| 50000 | 5%  | 2500 | 12,5 | 0,50% | 0,3% | 0,9% | 100,00% | 28,2%  |
| 50000 | 5%  | 2500 | 2,5  | 0,10% | 0,0% | 0,3% | 71,29%  | 63,2%  |
| 50000 | 5%  | 2500 | 2,25 | 0,09% | 0,0% | 0,3% | 65,76%  | 66,6%  |
| 50000 | 5%  | 2500 | 2    | 0,08% | 0,0% | 0,3% | 59,41%  | 70,7%  |
| 50000 | 5%  | 2500 | 1,75 | 0,07% | 0,0% | 0,3% | 52,22%  | 75,6%  |
| 50000 | 5%  | 2500 | 1,5  | 0,06% | 0,0% | 0,3% | 44,22%  | 81,6%  |
| 50000 | 5%  | 2500 | 1,25 | 0,05% | 0,0% | 0,3% | 35,54%  | 89,4%  |
| 50000 | 5%  | 2500 | 1    | 0,04% | 0,0% | 0,2% | 26,42%  | 100,0% |
| 50000 | 5%  | 2500 | 0,75 | 0,03% | 0,0% | 0,2% | 17,33%  | 115,5% |
| 50000 | 5%  | 2500 | 0,5  | 0,02% | 0,0% | 0,2% | 9,02%   | 141,4% |
| 50000 | 5%  | 2500 | 0,25 | 0,01% | 0,0% | 0,2% | 2,65%   | 200,0% |

Table 2 shows the evolution by week of the 95% CI, the cumulative probability of observing at least one AEI in the study cohort and the relative standard error (RSE) in the course of the study for a range of scenarios in term of cohort size, vaccine coverage and probability of AEI of 1%. With an overall sample size of a minimum of about 50,000 subjects medically followed by the enrolled GP practices, a follow-up period of 14 weeks, a vaccine coverage of 5%, 10% or 20%, the corresponding probability to observe at least one event in our study population varies from 53% to 99% after week 1, and the associated relative standard error varies from 53% to 37% depending on the scenario.

**Table 2 – Confidence intervals, Relative Standard Error cumulative probability to observe at least one AEI by week associated with a probability of occurrence of event of 1%**

| Week | Expected Population medically followed by the enrolled practices | Cumulative Vaccine coverage after 14 weeks | Cumulative number of Vaccinated subjects | Cumulative number of Subjects reported $\geq 1$ AEI | Average Proportion of AEI reported | Lower 95%CL | Upper 95%CL | Cumulative Probability to observe at least one event | Associated Relative standard error (RSE) |
|------|------------------------------------------------------------------|--------------------------------------------|------------------------------------------|-----------------------------------------------------|------------------------------------|-------------|-------------|------------------------------------------------------|------------------------------------------|
| 1    | 50000                                                            | 20%                                        | 714                                      | 7                                                   | 1,00%                              | 0,4%        | 2,0%        | 99,37%                                               | 37,2%                                    |
| 2    | 50000                                                            | 20%                                        | 1428                                     | 14                                                  | 1,00%                              | 0,5%        | 1,6%        | 100,00%                                              | 26,3%                                    |
| 3    | 50000                                                            | 20%                                        | 2142                                     | 21                                                  | 1,00%                              | 0,6%        | 1,5%        | 100,00%                                              | 21,5%                                    |
| 4    | 50000                                                            | 20%                                        | 2857                                     | 28                                                  | 1,00%                              | 0,7%        | 1,4%        | 100,00%                                              | 18,6%                                    |
| 5    | 50000                                                            | 20%                                        | 3571                                     | 35                                                  | 1,00%                              | 0,7%        | 1,4%        | 100,00%                                              | 16,7%                                    |
| 6    | 50000                                                            | 20%                                        | 4285                                     | 42                                                  | 1,00%                              | 0,7%        | 1,3%        | 100,00%                                              | 15,2%                                    |
| 7    | 50000                                                            | 20%                                        | 5000                                     | 50                                                  | 1,00%                              | 0,7%        | 1,3%        | 100,00%                                              | 14,1%                                    |
| 8    | 50000                                                            | 20%                                        | 5714                                     | 57                                                  | 1,00%                              | 0,8%        | 1,3%        | 100,00%                                              | 13,2%                                    |
| 9    | 50000                                                            | 20%                                        | 6428                                     | 64                                                  | 1,00%                              | 0,8%        | 1,3%        | 100,00%                                              | 12,4%                                    |
| 10   | 50000                                                            | 20%                                        | 7142                                     | 71                                                  | 1,00%                              | 0,8%        | 1,3%        | 100,00%                                              | 11,8%                                    |
| 11   | 50000                                                            | 20%                                        | 7857                                     | 78                                                  | 1,00%                              | 0,8%        | 1,2%        | 100,00%                                              | 11,2%                                    |
| 12   | 50000                                                            | 20%                                        | 8571                                     | 85                                                  | 1,00%                              | 0,8%        | 1,2%        | 100,00%                                              | 10,7%                                    |
| 13   | 50000                                                            | 20%                                        | 9285                                     | 92                                                  | 1,00%                              | 0,8%        | 1,2%        | 100,00%                                              | 10,3%                                    |
| 14   | 50000                                                            | 20%                                        | 10000                                    | 100                                                 | 1,00%                              | 0,8%        | 1,2%        | 100,00%                                              | 9,9%                                     |
| 1    | 50000                                                            | 10%                                        | 357                                      | 3                                                   | 1,00%                              | 0,2%        | 2,4%        | 87,26%                                               | 52,7%                                    |
| 2    | 50000                                                            | 10%                                        | 714                                      | 7                                                   | 1,00%                              | 0,4%        | 2,0%        | 99,37%                                               | 37,2%                                    |
| 3    | 50000                                                            | 10%                                        | 1071                                     | 10                                                  | 1,00%                              | 0,4%        | 1,7%        | 99,98%                                               | 30,4%                                    |
| 4    | 50000                                                            | 10%                                        | 1428                                     | 14                                                  | 1,00%                              | 0,5%        | 1,6%        | 100,00%                                              | 26,3%                                    |
| 5    | 50000                                                            | 10%                                        | 1785                                     | 17                                                  | 1,00%                              | 0,6%        | 1,5%        | 100,00%                                              | 23,6%                                    |
| 6    | 50000                                                            | 10%                                        | 2142                                     | 21                                                  | 1,00%                              | 0,6%        | 1,5%        | 100,00%                                              | 21,5%                                    |
| 7    | 50000                                                            | 10%                                        | 2500                                     | 25                                                  | 1,00%                              | 0,6%        | 1,5%        | 100,00%                                              | 19,9%                                    |
| 8    | 50000                                                            | 10%                                        | 2857                                     | 28                                                  | 1,00%                              | 0,7%        | 1,4%        | 100,00%                                              | 18,6%                                    |
| 9    | 50000                                                            | 10%                                        | 3214                                     | 32                                                  | 1,00%                              | 0,7%        | 1,4%        | 100,00%                                              | 17,6%                                    |
| 10   | 50000                                                            | 10%                                        | 3571                                     | 35                                                  | 1,00%                              | 0,7%        | 1,4%        | 100,00%                                              | 16,7%                                    |
| 11   | 50000                                                            | 10%                                        | 3928                                     | 39                                                  | 1,00%                              | 0,7%        | 1,4%        | 100,00%                                              | 15,9%                                    |
| 12   | 50000                                                            | 10%                                        | 4285                                     | 42                                                  | 1,00%                              | 0,7%        | 1,3%        | 100,00%                                              | 15,2%                                    |
| 13   | 50000                                                            | 10%                                        | 4642                                     | 46                                                  | 1,00%                              | 0,7%        | 1,3%        | 100,00%                                              | 14,6%                                    |
| 14   | 50000                                                            | 10%                                        | 5000                                     | 50                                                  | 1,00%                              | 0,7%        | 1,3%        | 100,00%                                              | 14,1%                                    |
| 1    | 50000                                                            | 5%                                         | 178                                      | 1                                                   | 1,00%                              | 0,0%        | 3,1%        | 53,24%                                               | 74,6%                                    |
| 2    | 50000                                                            | 5%                                         | 357                                      | 3                                                   | 1,00%                              | 0,2%        | 2,4%        | 87,26%                                               | 52,7%                                    |
| 3    | 50000                                                            | 5%                                         | 535                                      | 5                                                   | 1,00%                              | 0,3%        | 2,2%        | 97,04%                                               | 43,0%                                    |
| 4    | 50000                                                            | 5%                                         | 714                                      | 7                                                   | 1,00%                              | 0,4%        | 2,0%        | 99,37%                                               | 37,2%                                    |
| 5    | 50000                                                            | 5%                                         | 892                                      | 8                                                   | 1,00%                              | 0,4%        | 1,8%        | 99,87%                                               | 33,3%                                    |

| 6    | 50000                                                            | 5%                                         | 1071                                     | 10                                                  | 1,00%                              | 0,4%        | 1,7%        | 99,98%                                               | 30,4%                                    |
|------|------------------------------------------------------------------|--------------------------------------------|------------------------------------------|-----------------------------------------------------|------------------------------------|-------------|-------------|------------------------------------------------------|------------------------------------------|
| 7    | 50000                                                            | 5%                                         | 1250                                     | 12                                                  | 1,00%                              | 0,5%        | 1,7%        | 100,00%                                              | 28,1%                                    |
| 8    | 50000                                                            | 5%                                         | 1428                                     | 14                                                  | 1,00%                              | 0,5%        | 1,6%        | 100,00%                                              | 26,3%                                    |
| 9    | 50000                                                            | 5%                                         | 1607                                     | 16                                                  | 1,00%                              | 0,6%        | 1,6%        | 100,00%                                              | 24,8%                                    |
| 10   | 50000                                                            | 5%                                         | 1785                                     | 17                                                  | 1,00%                              | 0,6%        | 1,5%        | 100,00%                                              | 23,6%                                    |
| 11   | 50000                                                            | 5%                                         | 1964                                     | 19                                                  | 1,00%                              | 0,6%        | 1,5%        | 100,00%                                              | 22,5%                                    |
| 12   | 50000                                                            | 5%                                         | 2142                                     | 21                                                  | 1,00%                              | 0,6%        | 1,5%        | 100,00%                                              | 21,5%                                    |
| 13   | 50000                                                            | 5%                                         | 2321                                     | 23                                                  | 1,00%                              | 0,6%        | 1,5%        | 100,00%                                              | 20,7%                                    |
| Week | Expected Population medically followed by the enrolled practices | Cumulative Vaccine coverage after 14 weeks | Cumulative number of Vaccinated subjects | Cumulative number of Subjects reported $\geq 1$ AEI | Average Proportion of AEI reported | Lower 95%CL | Upper 95%CL | Cumulative Probability to observe at least one event | Associated Relative standard error (RSE) |
| 14   | 50000                                                            | 5%                                         | 2500                                     | 25                                                  | 1,00%                              | 0,6%        | 1,5%        | 100,00%                                              | 19,9%                                    |

### Data sources

In this passive enhanced safety surveillance, there are two data sources. General practice EHR data, providing passive surveillance, with ADR cards completed by patients providing the enhanced component. The ADR cards are being returned to the patient's own practice to ensure confidentiality. The data from these cards would also be coded into the EHR and uploaded weekly (Figure 1).

1. General Practice EHR data recorded by the practice team. Weekly data about vaccine exposure, and any subsequent AEIs will be uploaded (anonymised) to University of Surrey. The EHR data contains both AEIs recorded by the practice team, as well as data reported to the practice on an ADR by a vaccinated patient.
2. ADR cards completed by patients. Among the 10 participating GP practices, patients who are vaccinated against influenza will be provided ADR cards. These ADR cards, customised following practice feedback to match EMA requirements, to collect AEIs reported after the receipt of influenza vaccination.

These data, originating from the two sources (patient completed ADR card, or practice recorded) will be then imported (anonymised) into the secure servers of the University of Surrey. The final dataset will therefore combine data routinely collected for all patients registered with the 10 participating sites and data collected from the ADR cards and encoded during the 2016/17 influenza season. In addition to the adverse event data, we will extract demographics, vaccination status, and relevant comorbidities.

We will only extract coded data, i.e. where the GP or other health professional codes a disease or symptom into the EHR system<sup>xi</sup>. The overwhelming majority of the large volume of research that has come out of UK primary care is based on coded data<sup>xii</sup>. The richness of primary care data are such that we anticipate being able to detect important AEIs<sup>xiii</sup>. We will request

practices to use the relevant Read code for ADR notifications, when recording data from a returned card (Read Code: 9G4 Adverse drug reaction notification).

### Data analyses

We will interpret coded data by the creation of ontologies that we will map to case-definitions, where available. However, we do not have the in depth descriptions required for case definition found, for example, in clinical trials. We will be inferring meaning from brief clinical coded information; though we have long experience of this and will have the opportunity to confirm with practices and practitioners how to interpret their clinical records.

Statistical analysis will consist primarily of descriptive statistics: rates and proportions for categorical data and summary statistics for continuous variables. Confidence intervals will be calculated; however, due to the effects of clustering and practice differences in this relatively small pilot these are likely to be wide. All statistical analysis will be conducted using R Studio.

#### *Analyses of the primary objective*

All analyses will be carried out by overall, by brand (Fluarix tetra vs. others), by age strata (6 months to 5 years; 6 to 12 years; 13 to 18 years;  $\geq 18$ -65 years;  $> 65$ ), and CMO-specified risk groups.

To estimate on a weekly basis the crude incidence rate of AEs within 7 days

- o The denominator will consist of the number vaccinated subjects receiving a vaccination card and reaching 7 days of follow-up post vaccination during the week of interest and cumulatively since the beginning of the study.
- o The numerator will encompass all vaccinated subjects reporting at least one AEI within 7 days following vaccination with a seasonal influenza vaccine

### ETHICS AND DISSEMINATION

#### *Ethical review*

'Defining Research' (<http://www.hra.nhs.uk/documents/2013/09/defining-research.pdf>), the National Research Ethics Service (NRES) guidance suggests that surveillance does not require formal review by a Research Ethics Committee. The research team will however sought an opinion from the NRES's Proportional Review system to check if formal approval from a NHS Research Ethics Committee (REC) is needed prior to the commencement of the study, as well as Section 251 approval. Ethical approval was granted by the Proportionate Review Subcommittee of the North East - Newcastle & North Tyneside 2 REC on 05/08/2016 (REC reference: 16/NE/0271). Section 251 application was not deemed necessary by the Health Research Authority (HRA) and the study received approval on 01/09/2016 (IRAS ID: 211560).

### *Data extraction and data management*

The method and governance procedure has been developed by the University of Surrey, using an approved provider, Apollo Medical Software Solutions Ltd. Alternatively, we will use another approved data extraction supplier, or securely extract the relevant study data ourselves using standard data extraction tools such as Morbidity Information Query Export Syntax (MIQUEST), a Department of Health sponsored data extract tool. Data extractions will be conducted in accordance with the Research Group's standard operating procedures in data extraction, pseudonymisation, and transfer.

All data are strongly encrypted by a combination of symmetric and asymmetric encryption algorithms: Triple DES<sup>1</sup> and RSA 1024<sup>2</sup> before transmission, and utilises public and private key pairs unique to each project. Data are pseudonymised as near to source as possible. Pseudonymisation is applied at this stage to allow for backwards identification should there be a need to do so as part of an ethically approved study.

Pseudonymisation is a process that involves the removal of all personal identifiers from data – such as name, date of birth, etc. However, there is a risk that if data are linked to other data a person might be identified<sup>xiv</sup>. Therefore although all identifiers are removed we keep data encrypted during transfer and on a secure network that meets NHS Information Governance standards to minimise the risk of re-identification. Pseudonymisation is the standard approach for this type of surveillance. A legally binding definition of pseudonymisation has been introduced into European law<sup>xv</sup> on the recommendation of the European Data Protection Supervisor (EDPS)<sup>xvi</sup>.

All data processing and analysis in the present proposed study will be conducted within the secure IT environment of the Clinical Informatics Research Group, at the University of Surrey. The information security policies and procedures of the Research Group have been approved by the NHS Health and Social Care Information Centre (HSCIC) as meeting Information Governance Toolkit (IGT) standards<sup>xvii</sup>. The University of Surrey is registered with the Information Commissioner's Office Data Protection Register, and is compliant with the Data Protection Act, and other legislations.

In line with the principle of the Data Protection Act 1998, data subjects will be informed of the uses of their data in this study. Participating GP practices will be asked to display project

---

<sup>1</sup> This is also referred to as "3DES", which is the commonly used name for the triple data encryption algorithm (TDEA, also written Triple DEA) symmetric-key block cipher.

<sup>2</sup> RSA stands for Rivest, Shamir and Aldeman who founded RSA Laboratories. They created large numbers with only two prime factors, a core component of the encryption process



1  
2  
3  
4 information in their website, and project information posters in reception areas, from when  
5 the practice has consented to take part in the study and until the study is completed. We will  
6 respect the codes in the data indicating that a patient does not wish to have their record  
7 available for research; we will, however, seek to report the number of patients within a  
8 practice who have chosen to opt out.  
9  
10

11  
12 No Personally Identifiable Information (PII) such as NHS numbers, postcodes, dates of birth,  
13 etc. will be available to GSK, third parties, or disclosed in publications. Additionally, no patient  
14 level data will be sent to GSK to remove any possibility that any individual patient might be re-  
15 identified. GSK will also be blind to practice identities, and the locality at which any AEI occurs;  
16 other than where the patient gives consent, or their own chooses to report any condition in  
17 line with best practice.  
18  
19  
20

#### 21 *Safety reporting, including routine pharmacovigilance*

22 This study's primary endpoints are safety-related. However, it will be clearly communicated to  
23 participating practices that the study does not replace AEI reporting that would occur as part  
24 of routine practice. If a GP felt an AEI merited reporting they should do so in whatever way  
25 they would generally do so. If the team at the University of Surrey becomes aware of a serious  
26 adverse event (SAE) experienced by a study participant, the SAE should be reported to GSK  
27 within 24 hours of awareness, in writing. An SAE is defined as any untoward medical  
28 occurrence that:  
29  
30  
31  
32

- 33 • Results in death,
- 34 • Life-threatening (where the participant is at risk of death),
- 35 • Requires hospitalization or prolongation of existing hospitalization,
- 36 • Results in disability/incapacity (where there is a substantial disruption of a person's  
37 ability to conduct normal life functions)..
- 38 • Important medical events -events that may not be immediately life-threatening or  
39 result in death or hospitalization but may jeopardize the study participant or may  
40 require medical or surgical intervention to prevent one of the other outcomes listed in  
41 the above definition.  
42  
43  
44  
45  
46  
47

#### 48 *Dissemination and Public Register Disclosure*

49 The outputs from the research will be disseminated primarily through peer review papers in  
50 high impact journals within the domains of primary care, surveillance, vaccines, and infectious  
51 diseases<sup>xviii xix</sup>. We will present findings at relevant seminars and conferences. The University of  
52 Surrey, in accordance with GSK policy, will post a summary of the study protocol and results  
53 within 12 months of study completion and following review and comment by GSK on GSK's  
54 Clinical Study Register, accessible at <http://www.gsk-clinicalstudyregister.com> and at  
55  
56  
57  
58  
59  
60



1  
2  
3  
4 www.clinicaltrials.gov.  
5  
6

## 7 **AUTHOR CONTRIBUTIONS**

### 8 **SdeL**

9  
10 Simon de Lusignan developed the study design, and is the main writer of the protocol.  
11  
12

### 13 **GDS**

14  
15 Gaël Dos Santos helped with the study design development, and contributed to the writing.  
16  
17

### 18 **AC**

19 Ana Correa contributed to the methods and analysis section of this protocol.  
20  
21

### 22 **FH**

23 François Haguinet contributed to the sample size and analysis section of this protocol.  
24  
25

### 26 **IY**

27 Ivelina Yonova helped develop the practice recruitment methods, and contributed to writing  
28 the protocol.  
29  
30

### 31 **FL**

32 Florence Lair reviewed the protocol, and contributed to the writing.  
33  
34

### 35 **RB**

36 Rachel Byford helped develop the data flow structure, and contributed to writing the protocol.  
37  
38

### 39 **FF**

40 Filipa Ferreira extensively reviewed the protocol, and contributed to the writing.  
41  
42

### 43 **KS**

44 Karen Stuttard reviewed the protocol, and contributed to the writing.  
45  
46

### 47 **TC**

48 Tom Chan contributed to the ethical implications and background section of this protocol.  
49  
50  
51  
52  
53  
54  
55  
56  
57  
58  
59  
60

**FUNDING STATEMENT**

This work was supported by GlaxoSmithKline Vaccines, study number 202056.

**COMPETING INTERESTS STATEMENT**

SdeL and AC participate in a European consortium called IMOVE+ funded by Horizon 2020 to monitor seasonal influenza vaccine effectiveness across Europe.

**DATA SHARING STATEMENT**

Once the study is completed, we will publish all relevant aggregated results. Unpublished aggregated results could be made available, upon request, by the authors.

## REFERENCES

- <sup>i</sup> European Medicines Agency (EMA) Pharmacovigilance Risk Assessment Committee (PRAC). Interim guidance on enhanced safety surveillance for seasonal influenza vaccines in the EU. London, EMA: Ref: EMA/PRAC/222346/2014; 10 April 2014. URL: [http://www.ema.europa.eu/docs/en\\_GB/document\\_library/Scientific\\_guideline/2014/04/WC500165492.pdf](http://www.ema.europa.eu/docs/en_GB/document_library/Scientific_guideline/2014/04/WC500165492.pdf)
- <sup>ii</sup> European Medicines Agency (EMA). Explanatory note on the withdrawal of the note for guidance on harmonization of requirements for influenza vaccines and of the core SmPC/PL for inactivated seasonal influenza vaccines. London: EMA; 2014. Contract No.: EMA/CHMP/VWP/40560/2014. Available from: [http://www.ema.europa.eu/ema/index.jsp?curl=pages/includes/document/document\\_detail.jsp?webContentId=WC500161022&mid=WC0b01ac058009a3dc](http://www.ema.europa.eu/ema/index.jsp?curl=pages/includes/document/document_detail.jsp?webContentId=WC500161022&mid=WC0b01ac058009a3dc)
- <sup>iii</sup> Correa, A., Hinton, W., McGovern, A., van Vlymen, J., Yonova, I., Jones, S., de Lusignan, S. Cohort profile: Royal College of General Practitioners Research and Surveillance Centre (RCGP RSC) sentinel network. *BMJ Open* 2016;6:e011092. doi:10.1136/bmjopen-2016-011092
- <sup>iv</sup> Royal College of General Practitioners (RCGP) Research and Surveillance Centre (RSC). URL: <http://www.rcgp.org.uk/clinical-and-research/our-programmes/research-and-surveillance-centre.aspx>
- <sup>v</sup> Public Health England, Department of Health, NHS England. Flu plan Winter 2015/16. 2015. PHE publications gateway number: 2014833. URL: [https://www.gov.uk/government/uploads/system/uploads/attachment\\_data/file/418038/Flu\\_Plan\\_Winter\\_2015\\_to\\_2016.pdf](https://www.gov.uk/government/uploads/system/uploads/attachment_data/file/418038/Flu_Plan_Winter_2015_to_2016.pdf)
- <sup>vi</sup> National Institute for Health Research Clinical Research Network. Guide to the NIHR CRN Industry Costing Template: Costing Industry Sponsored Studies (version: April 2014). URL: <https://www.crn.nihr.ac.uk/wp-content/uploads/Industry/GUIDE%20to%20Industry%20Costing%20Template-APRIL2014.pdf>
- <sup>vii</sup> David A. Asch M.Kathryn Jedrzejewski, Nicholas A. Christakis, Response rates to mail surveys published in medical journals *Journal of Clinical Epidemiology* Volume 50, Issue 10, October 1997, Pages 1129–1136
- <sup>viii</sup> Workforce and Facilities Team, Health and Social Care Information Centre. General and Personal Medical Services: England 2003-13. 25 March 2014. URL: <http://www.hscic.gov.uk/catalogue/PUB13849/nhs-staf-2003-2013-gene-prac-rep.pdf>
- <sup>ix</sup> Public Health England. Vaccine uptake guidance and the latest coverage data. <https://www.gov.uk/government/collections/vaccine-uptake#seasonal-flu-vaccine-uptake>
- <sup>x</sup> Clopper CJ, Pearson ES. The use of confidence or fiducial limits illustrated in the case of binomial. *Biometrika*. 1934; 26:404-413
- <sup>xi</sup> de Lusignan S. Codes, classifications, terminologies and nomenclatures: definition, development and application in practice. *Inform Prim Care*. 2005;13(1):65-70.
- <sup>xii</sup> Kousoulis AA, Rafi I, de Lusignan S. The CPRD and the RCGP: building on research success by enhancing benefits for patients and practices. *Br J Gen Pract*. 2015 Feb;65(631):54-5. doi: 10.3399/bjgp15X683353.
- <sup>xiii</sup> de Lusignan S, van Weel C. The use of routinely collected computer data for research in primary care: opportunities and challenges. *Fam Pract*. 2006;23(2):253-63.
- <sup>xiv</sup> National Health Service (NHS). Pseudonymisation and anonymisation of data policy (last reviewed: 27 April 2015), accessed 09/06/2016. URL: [http://www.google.fr/url?url=http://www.nhsbsa.nhs.uk/Documents/NHSBSACorporatePoliciesandProcedures/Pseudonymisation\\_and\\_Anonymisation\\_of\\_Data\\_Policy.doc&rct=j&frm=1&q=&esrc=s&sa=U&ved=0ahUKewjZrQpVz4fNAhWEB8AKHU0IBz4QFggUMAA&usg=AFQjCNF-JPX5zueirRIBylzoF-WAEDNkmg](http://www.google.fr/url?url=http://www.nhsbsa.nhs.uk/Documents/NHSBSACorporatePoliciesandProcedures/Pseudonymisation_and_Anonymisation_of_Data_Policy.doc&rct=j&frm=1&q=&esrc=s&sa=U&ved=0ahUKewjZrQpVz4fNAhWEB8AKHU0IBz4QFggUMAA&usg=AFQjCNF-JPX5zueirRIBylzoF-WAEDNkmg)
- <sup>xv</sup> European Union. Justice. Reform of EU data protection rules. URL: [http://ec.europa.eu/justice/data-protection/reform/index\\_en.htm](http://ec.europa.eu/justice/data-protection/reform/index_en.htm)
- <sup>xvi</sup> EUR-lex. EDPS recommendations on the EU's options for data protection reform. URL: [http://eur-lex.europa.eu/legal-content/EN/TXT/?uri=CELEX%3A52015XX0912\(01\)#ntc14-C\\_2015301EN.01000101-E0014](http://eur-lex.europa.eu/legal-content/EN/TXT/?uri=CELEX%3A52015XX0912(01)#ntc14-C_2015301EN.01000101-E0014)
- <sup>xvii</sup> Health and Social Care Information Centre (HSCIC). Information Governance Toolkit (IGT). URL: <https://www.igt.hscic.gov.uk/>
- <sup>xviii</sup> MRC Policy and Guidance on Sharing of Research Data from Population and Patient Studies (Sept 2011) <http://www.mrc.ac.uk/Ourresearch/Ethicsresearchguidance/datasharing/Policy/index.htm>
- <sup>xix</sup> Economic Co-operation and Development (OECD). "Promoting Access to Public Research Data for Scientific, Economic and Social Development" 2007 <http://www.oecd.org/sti/sci-tech/38500813.pdf>

1  
2  
3  
4  
5  
6  
7  
8  
9  
10  
11  
12  
13  
14  
15  
16  
17  
18  
19  
20  
21  
22  
23  
24  
25  
26  
27  
28  
29  
30  
31  
32  
33  
34  
35  
36  
37  
38  
39  
40  
41  
42  
43  
44  
45  
46  
47  
48  
49  
50  
51  
52  
53  
54  
55  
56  
57  
58  
59  
60

Flow chart 4: Data capture flow chart – patient flu vaccinated in the surgery

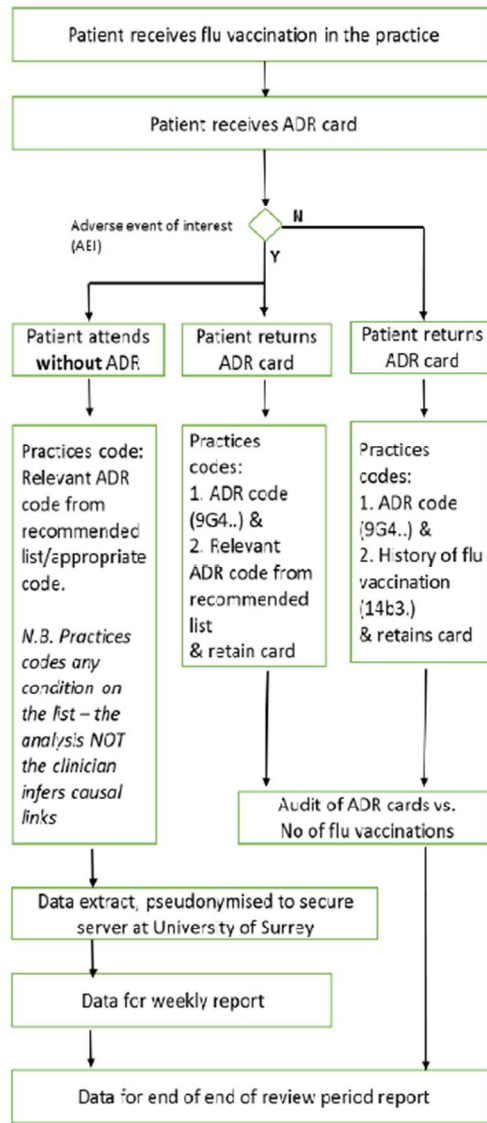

156x231mm (96 x 96 DPI)

# BMJ Open

## Post-authorisation passive enhanced safety surveillance of seasonal influenza vaccines: Pilot study in England

|                                 |                                                                                                                                                                                                                                                                                                                                                                                                                                                                                                                                                                                                                                                                                                                                                |
|---------------------------------|------------------------------------------------------------------------------------------------------------------------------------------------------------------------------------------------------------------------------------------------------------------------------------------------------------------------------------------------------------------------------------------------------------------------------------------------------------------------------------------------------------------------------------------------------------------------------------------------------------------------------------------------------------------------------------------------------------------------------------------------|
| Journal:                        | <i>BMJ Open</i>                                                                                                                                                                                                                                                                                                                                                                                                                                                                                                                                                                                                                                                                                                                                |
| Manuscript ID                   | bmjopen-2016-015469.R1                                                                                                                                                                                                                                                                                                                                                                                                                                                                                                                                                                                                                                                                                                                         |
| Article Type:                   | Protocol                                                                                                                                                                                                                                                                                                                                                                                                                                                                                                                                                                                                                                                                                                                                       |
| Date Submitted by the Author:   | 17-Mar-2017                                                                                                                                                                                                                                                                                                                                                                                                                                                                                                                                                                                                                                                                                                                                    |
| Complete List of Authors:       | de Lusignan, Simon; University of Surrey, Department of Clinical and Experimental Medicine<br>Dos Santos, Gaël; GlaxoSmithKline Vaccines<br>Correa, Ana; University of Surrey, Department of Clinical and Experimental Medicine<br>Haguinet, François; GlaxoSmithKline Vaccines<br>Yonova, Ivelina; University of Surrey, Department of Clinical and Experimental Medicine<br>Lair, Florence; GlaxoSmithKline Vaccines<br>Byford, Rachel; University of Surrey, Department of Clinical and Experimental Medicine<br>Ferreira, Filipa; University of Surrey, Department of Clinical and Experimental Medicine<br>Stuttard, Karen; GlaxoSmithKline Vaccines<br>Chan, Tom; University of Surrey, Department of Clinical and Experimental Medicine |
| <b>Primary Subject Heading</b>: | Epidemiology                                                                                                                                                                                                                                                                                                                                                                                                                                                                                                                                                                                                                                                                                                                                   |
| Secondary Subject Heading:      | General practice / Family practice, Infectious diseases, Epidemiology, Research methods, Health policy                                                                                                                                                                                                                                                                                                                                                                                                                                                                                                                                                                                                                                         |
| Keywords:                       | EPIDEMIOLOGY, Public health < INFECTIOUS DISEASES, BIOTECHNOLOGY & BIOINFORMATICS, PREVENTIVE MEDICINE, PRIMARY CARE, Adverse events < THERAPEUTICS                                                                                                                                                                                                                                                                                                                                                                                                                                                                                                                                                                                            |
|                                 |                                                                                                                                                                                                                                                                                                                                                                                                                                                                                                                                                                                                                                                                                                                                                |

SCHOLARONE™  
Manuscripts

**Post-authorisation passive enhanced safety surveillance of seasonal influenza vaccines:  
Pilot study in England**

**Simon de Lusignan**

(Principal Investigator)\*<sup>1</sup>

Professor of Primary Care and Clinical Informatics

Chair in Health Care Management,

University of Surrey

[s.lusignan@surrey.ac.uk](mailto:s.lusignan@surrey.ac.uk)

+44 0 1483 684802

**Gaël Dos Santos**

Epidemiologist, Global Epidemiology<sup>2</sup>

[gael.x.dos-santos@gsk.com](mailto:gael.x.dos-santos@gsk.com)

**Ana Correa**

Primary Care Scientist<sup>1</sup>

Department of Clinical and Experimental Medicine, University of Surrey

[a.correa@surrey.ac.uk](mailto:a.correa@surrey.ac.uk)

**François Haguinet**

Bio-Statistician, Global Epidemiology<sup>2</sup>

[francois.f.haguinet@gsk.com](mailto:francois.f.haguinet@gsk.com)

**Ivelina Yonova**

Practice Liaison Officer<sup>1</sup>

Department of Clinical and Experimental Medicine, University of Surrey

[i.yonova@surrey.ac.uk](mailto:i.yonova@surrey.ac.uk)

**Florence Lair**

Study Delivery Lead<sup>2</sup>

[florence.x.lair@gsk.com](mailto:florence.x.lair@gsk.com)

**Rachel Byford**

Senior Database Developer<sup>1</sup>

Department of Clinical and Experimental Medicine, University of Surrey

[r.byford@surrey.ac.uk](mailto:r.byford@surrey.ac.uk)

**Filipa Ferreira**

Programme Manager<sup>1</sup>

Department of Clinical and Experimental Medicine, University of Surrey

[f.ferreira@surrey.ac.uk](mailto:f.ferreira@surrey.ac.uk)

**Karen Stuttard**Local Delivery Lead<sup>2</sup>[karen.e.stuttard@gsk.com](mailto:karen.e.stuttard@gsk.com)**Tom Chan**Senior Research Fellow<sup>1</sup>

Department of Clinical and Experimental Medicine, University of Surrey

[t.chan@surrey.ac.uk](mailto:t.chan@surrey.ac.uk)<sup>1</sup>Department of Clinical and Experimental Medicine

University of Surrey

Guildford

Surrey GU2 7XH

UK

W: [www.clininf.eu](http://www.clininf.eu)<sup>2</sup>GSK Vaccines

Rue de l'Institut 89

1330 Rixensart

Belgium

Word count: 4106

1  
2  
3  
4 **Post-authorisation passive enhanced safety surveillance of seasonal influenza vaccines:**  
5 **Pilot study in England**  
6

7  
8 **ABSTRACT**  
9

10  
11 **Aim:**

12 To pilot enhanced safety surveillance of seasonal influenza vaccine meeting the European  
13 Medicines Agency (EMA) requirement to rapidly detect a significant increase in the frequency  
14 or severity of expected reactions. These local, systemic or allergic reactions are termed Adverse  
15 Events of Interest (AEI) by EMA and may indicate risk from the new season's vaccine.  
16  
17

18  
19 *Study design:* A prospective passive enhanced safety surveillance combining data collection  
20 from adverse drug reaction (ADR) cards with automated collection of pseudonymised routinely  
21 collected electronic health record (EHR) data. This study builds on a feasibility study carried out  
22 at the start of the 2015/2016 flu season. We will report flu vaccine exposure and any AEs  
23 reported via ADR card or recorded directly into the EHR, from the commencement of influenza  
24 vaccination and ends as specified by EMA (30<sup>th</sup> November, 2016).  
25  
26

27  
28 *Setting:* Ten volunteer English general practices, primarily using the GSK influenza vaccines.  
29 They had selected this vaccine in advance of the study.  
30  
31

32 *Participants:* People who receive a GSK brand influenza vaccine. At least 100 vaccinees in each  
33 age-group defined in EMA interim guidance: 6months to 5years; 6-12 years; 13-17 years; 18-65  
34 years; and >65years old.  
35  
36

37  
38 *Outcome measures:*

39 The primary outcome measure is the rate of AEs occurring within 7 days post-vaccination,  
40 using passive surveillance of GP electronic health record (HER) systems enhanced by a card-  
41 based ADR reporting system. Extracted data will be presented overall, by brand (Fluarix Tetra  
42 vs. others), by EMA defined age strata, and CMO-specified risk groups.  
43  
44

45  
46 We will produce an interim analysis within 8 weeks, and an end of study report.  
47  
48  
49  
50  
51  
52  
53  
54  
55  
56  
57  
58  
59  
60



## STRENGTHS AND LIMITATIONS

### *Strengths*

- This study sets out the first methods for near real time enhanced passive surveillance of seasonal influenza vaccine using routinely collected data.
- Customised adverse drug reaction cards may enhance reporting over standard passive surveillance, which may result in under-reporting of less severe symptoms not requiring medical attendance.
- The methods outlined in this study have the potential to be expanded to other brands.
- The practice recruitment is intended to have wide and representative coverage of England.
- The data of the participating patients will be thoroughly protected by means of a pseudonymising algorithm that allowed removal of strong identifiers.

### *Limitations*

- This feasibility study has not been powered or designed to detect rare events or detect significant statistical differences of adverse event rates across brands.
- We are also exploring the feasibility of using rates of adverse events in non-vaccinated patients as a basis for comparison.

## INTRODUCTION

### *EMA guidance*

In response to a recent expansion of national vaccination programmes in EU member states, the European Medicines Agency has released interim guidance on enhanced safety surveillance for seasonal influenza vaccines in the EU<sup>1</sup>. This set out new standards for surveillance that all Marketing Authorisation Holders (MAHs) providing vaccines in the EU must address. The key objective of the EMA enhanced safety surveillance is to rapidly detect a significant increase in the frequency and/or severity of expected reactions (local, systemic or allergic reactions) that may indicate a potential or more serious risk, as exposure to the vaccine increases.

Since 2015, European regulatory requirements to evaluate the safety and immunogenicity of seasonal influenza vaccines in small scale clinical trials were withdrawn<sup>2</sup>. Such trials had insufficient power to adequately evaluate safety concerns arising from annual formulation changes (e.g. adverse events occurring at a rate of 1–2%). These clinical trials are to be replaced by enhanced, preferably active, safety monitoring and vaccine effectiveness assessments.

The EMA Interim Guidance on enhanced safety surveillance for seasonal influenza vaccines in the EU suggested that there would be 3 options envisioned for enhanced surveillance:

- *Enhanced Active surveillance (post authorisation safety studies (PASS))*: Active follow-up of a cohort of children and adults for 7 days after immunisation for reactogenicity endpoints/adverse events.
- *Enhanced Passive Surveillance*: Rapidly estimate vaccine usage and facilitate adverse drug reaction (ADR) reporting, in order to determine reporting rate as a surrogate of incidence of the adverse events of interest (AEIs).
- *Data mining* or other use of electronic health record/ computerised medical record.

We opted for enhanced passive surveillance because, whilst highly computerised medical records system maximise the likelihood of reliably capturing the AEIs, we felt this needed enhancement through the use of customised ADR cards. These cards were pre-printed with the categories of possible adverse events to facilitate the reporting and the subsequent coding of events. They also contained a specific tick box when no AEIs were experienced leading to a reasonably acceptable return rate.

We expect that, by enhancing surveillance with a customised card and encouraging patients to directly report their symptoms, we will more reliably detect a greater number of events. The

1  
2  
3  
4 proposed approach was designed to meet the EMA enhanced passive surveillance definition.  
5  
6

7 The present collaborative pilot study between MAH GlaxoSmithKline Biologicals (GSK) and the  
8 Clinical Informatics and Health Outcomes Research Group at the University of Surrey builds  
9 on the lessons learned from the pilot study (EPI-FLU-045 VS UK) implemented during the  
10 2014/2015 influenza season and aims to address the EMA commitment for enhanced safety  
11 surveillance of seasonal vaccines in Europe. We will begin data collection on September 1<sup>st</sup>,  
12 2016, and the analysis will be completed on March 31<sup>st</sup>, 2017.  
13  
14

15  
16 The EPI-FLU-045 VS UK pilot study showed that the proposed surveillance setting in the UK  
17 was suitable to rapidly detect and evaluate potential new safety concerns each influenza  
18 season. The primary purpose of the 2016/17 pilot study is to improve the combination of an  
19 ADR card-based system and the use of routine data to collect adverse events following  
20 vaccination with seasonal influenza vaccines.  
21  
22

#### 23 24 25 *The RCGP RSC network*

26 The Clinical Informatics Research Group, in the Department of Clinical and Experimental  
27 Medicine (DCEM) at the University of Surrey is the home of the data and analysis hub for the  
28 Royal College of General Practitioners Research and Surveillance Centre (RCGP RSC). The  
29 RCGP RSC provides a national primary care surveillance system and is supported by Public  
30 Health England (PHE). The RCGP RSC network of practices has a membership designed to give  
31 representative coverage of 1.5%-2% of the English population<sup>3</sup>. The RCGP RSC has been  
32 described as the gold standard sentinel network.  
33  
34  
35

36  
37 The most important work of the RCGP RSC network is its influenza surveillance; many practices  
38 have been involved in this work for decades<sup>4</sup>. Data are uploaded from the network on a  
39 weekly basis to a secure sever, with the possibility to switch the frequency of the release to a  
40 twice weekly upload during epidemics. The methods developed by the University of Surrey will  
41 be used in this passive enhanced safety surveillance study, with a focus on reporting on  
42 adverse events.  
43  
44

#### 45 46 47 *Seasonal influenza vaccination in England*

48 Seasonal influenza vaccines present several specific challenges for pharmacovigilance. These  
49 include immunisation in large population cohorts in a relatively short and fixed time period  
50 each year, and multiplicity of vaccine products on the market with the need to conduct  
51 product-specific safety surveillance. In the UK, the 2015/2016 influenza plan recommended the  
52 following groups to be vaccinated<sup>5</sup>:  
53

- 54 • People aged 65 years or over (based on age on 31 March, 2016)
- 55 • People aged from 6 months to less than 65 years of age with a medical condition:  
56  
57  
58  
59  
60

- chronic (long-term) respiratory disease, such as severe asthma
  - chronic obstructive pulmonary disease (COPD) or bronchitis
  - chronic heart disease, such as heart failure
  - chronic kidney disease, stages 3-5
  - chronic liver disease
  - chronic neurological disease, such as Parkinson's disease or motor neurone disease, or a learning disability
  - diabetes
  - splenic dysfunction
  - immunocompromised due to disease (such as HIV/AIDS) or treatment (such as cancer treatment)
- All pregnant women (including those women who become pregnant during the flu season)
  - All those aged 2, 3, and 4 years (but not 5 years or older) on 31 August, 2015 (i.e. date all children of school years 1 and 2 age through locally commissioned arrangements).
  - Primary school-aged children in areas that participated in primary school pilots in 2014/15.
  - People living in long-stay residential care homes or other long-stay care facilities.
  - People who are in receipt of a carer's allowance, or those who are the main carer of an older or disabled person.
  - Household contacts of immunocompromised individuals.

The list above is not exhaustive, and the healthcare practitioner should apply clinical judgement to take into account the risk of flu exacerbating any underlying disease.

Expansion of national vaccination has created a greater need for timely information and reassurance on the balance of risks and benefits for those receiving the vaccines. The collaborative pilot study is conceived in response to the EU requirements triggered by the EMA's call for enhanced safety surveillance in Europe. The continuation of the pilot study in the 2016/17 season will help to build a framework for passive enhanced safety surveillance in England, but will also contribute to an EU-wide programme of enhanced safety surveillance for seasonal influenza vaccines.

## RESEARCH METHODS

This published protocol is a summary of the full protocol, submitted for ethical approval, the long version is available as a supplementary file.

### Objectives and endpoints

*Primary objective:*

- To estimate on a weekly basis the crude and cumulative incidence rate of AEs within 7 days following vaccination with a seasonal influenza vaccine, using passive surveillance of GP electronic health record (HER) systems enhanced by a card-based ADR reporting system. Extracted data will be presented overall, by brand (Fluarix Tetra vs. others), by EMA defined age strata, and CMO- specified risk groups.

*Primary endpoints:*

- Occurrence and onset dates of AEs within 7 days post vaccination reported using a card based ADR reporting system in vaccinated patients overall, by brand (also indicating those for whom brand data are unavailable), by age strata (6 months to 5 years; 6 to 12 years; 13 to 17 years; 18-65 years; >65) and CMO-specified risk groups. AEs will be presented by categories depending of the nature of the event.
  - Fever or other febrile illness
  - Local reactions
  - General reaction (e.g. fatigue, myalgia, etc.)

## **Study Design**

*Study setting and population*

The proposed pilot study (EPI-FLU-046 VS UK) is to follow a cohort of patients who would be exposed to seasonal influenza vaccination in the months between 01/09/2016 and 30/11/2016. The final data collection will occur on 10/01/2017 to allow for any delays in records of up to 6 weeks.

Invitation letters will be sent to GP practices ordering mainly GSK's Fluarix Tetra vaccine for the 2016/17 season, and evenly representative of geographical locations and systems. Practices will be reimbursed for their involvement in this study, according to the National Institute of Health Research (NIHR) guidelines for industry sponsored studies<sup>6</sup>.

For this pilot project, routinely collected primary care data from up to 10 GP practices will be extracted, to provide passive surveillance. However, this passive surveillance is enhanced by all practices additionally using a card-based ADR reporting system. In last year's study the card-based ADR reporting system, used the Yellow Card developed by the UK Medicines and Healthcare products Regulation Agency (MHRA). We have developed a more specific ADR card for use in this study, which will be distributed to practices. The new ADR card is pre-printed with the categories of likely AEs the EMA require surveillance for, to facilitate the recording of AEs and to make their coding into the GP EHR system easier. There was also a tick box for no AEI.

1  
2  
3  
4 Patients will be provided with the appropriate ADR reporting card and invited to return the  
5 card to the GP practices within 7 days, but not later than 14 days, post-vaccination<sup>7</sup>. To protect  
6 confidentiality, this ADR card will be returned to the practice, and data from it will be  
7 recorded in that patient's EHR. The data will be used to estimate proportions of AEs among  
8 influenza-vaccinated individuals.  
9  
10

#### 11 *Inclusion criteria*

12 All patients receiving a seasonal influenza vaccine between 01/09/2016 and 30/11/2016 in 1 of  
13 the 10 volunteer practices are eligible for inclusion in the analysis. The main inclusion criteria  
14 for practices is that they state their principal vaccine supplier will be GSK.  
15  
16  
17  
18

#### 19 *Exclusion criteria*

20 Patients who have explicitly opted out of data sharing will be excluded from the analysis. We  
21 will identify these patients using the opt-out codes within GP information systems where the  
22 patients have made an explicit choice to opt out; patients will be informed of their option to  
23 opt-out via posters in the practices and information sheets accompanying the ADR cards.  
24  
25  
26

#### 27 *Sample size calculation*

28 The average practice size in England and Wales is 7,034<sup>8</sup>, and we estimate that data will be  
29 collected on a population of approximately 70,340 patients (across ten practices). In the period  
30 from September to December 2015, the seasonal influenza vaccine uptake for over 65 year  
31 olds was 71.0%; for those in a clinical risk group aged 6 months to 65 years old, the uptake  
32 was 45.1%; and for pregnant women, it was 42.3%. We have estimated influenza vaccine  
33 uptake using the coverage estimates published by Public Health England (PHE)<sup>9</sup>.  
34  
35  
36  
37

38 The minimum needed target population to be medically followed by the GPs is estimated at  
39 50,000 subjects (approximately 5,000 per practice). We expect to enrol at least 5,000  
40 vaccinated subjects with a 7 days of follow-up after vaccination (as per EMA interim guidance  
41 request). This sample size estimation sets out to estimate the probability to observe at least  
42 one AEI in the study population and evaluate the level of "certainty" around this finding; this  
43 is over the 14 week period of enhanced surveillance (01 September – 30 November 2016)  
44  
45  
46

47 We have not taken into account any effect of clustering in our surveillance study design or  
48 power calculation. Similarities, or homogeneity, between subjects in clusters reduces the  
49 variability of their responses, compared with that expected from a random sample.  
50  
51  
52  
53  
54  
55  
56  
57  
58  
59  
60

**Table 1 – Confidence intervals, Relative Standard Error and probability to observe at least one AEI according to expected probabilities of occurrence of AEI<sup>xx</sup>**

| Expected Population medically followed by the enrolled practices | Vaccine coverage | Vaccinated subjects | Subjects with events | Expected Proportion of subjects with ≥1 AEI reported | Lower 95%CL | Upper 95%CL | Probability to observe ≥1 AEI in the study population | Associated Relative standard error (RSE) |
|------------------------------------------------------------------|------------------|---------------------|----------------------|------------------------------------------------------|-------------|-------------|-------------------------------------------------------|------------------------------------------|
| 50000                                                            | 20%              | 10000               | 2000                 | 20,00%                                               | 19,2%       | 20,8%       | 100,00%                                               | 2,0%                                     |
| 50000                                                            | 20%              | 10000               | 1500                 | 15,00%                                               | 14,3%       | 15,7%       | 100,00%                                               | 2,4%                                     |
| 50000                                                            | 20%              | 10000               | 1000                 | 10,00%                                               | 9,4%        | 10,6%       | 100,00%                                               | 3,0%                                     |
| 50000                                                            | 20%              | 10000               | 500                  | 5,00%                                                | 4,6%        | 5,4%        | 100,00%                                               | 4,4%                                     |
| 50000                                                            | 20%              | 10000               | 400                  | 4,00%                                                | 3,6%        | 4,4%        | 100,00%                                               | 4,9%                                     |
| 50000                                                            | 20%              | 10000               | 200                  | 2,00%                                                | 1,7%        | 2,3%        | 100,00%                                               | 7,0%                                     |
| 50000                                                            | 20%              | 10000               | 100                  | 1,00%                                                | 0,8%        | 1,2%        | 100,00%                                               | 9,9%                                     |
| 50000                                                            | 20%              | 10000               | 10                   | 0,10%                                                | 0,0%        | 0,2%        | 99,95%                                                | 31,6%                                    |
| 50000                                                            | 20%              | 10000               | 9                    | 0,09%                                                | 0,0%        | 0,2%        | 99,88%                                                | 33,3%                                    |
| 50000                                                            | 20%              | 10000               | 8                    | 0,08%                                                | 0,0%        | 0,2%        | 99,70%                                                | 35,3%                                    |
| 50000                                                            | 20%              | 10000               | 7                    | 0,07%                                                | 0,0%        | 0,1%        | 99,27%                                                | 37,8%                                    |
| 50000                                                            | 20%              | 10000               | 6                    | 0,06%                                                | 0,0%        | 0,1%        | 98,27%                                                | 40,8%                                    |
| 50000                                                            | 20%              | 10000               | 5                    | 0,05%                                                | 0,0%        | 0,1%        | 95,96%                                                | 44,7%                                    |
| 50000                                                            | 20%              | 10000               | 4                    | 0,04%                                                | 0,0%        | 0,1%        | 90,85%                                                | 50,0%                                    |
| 50000                                                            | 20%              | 10000               | 3                    | 0,03%                                                | 0,0%        | 0,1%        | 80,09%                                                | 57,7%                                    |
| 50000                                                            | 20%              | 10000               | 2                    | 0,02%                                                | 0,0%        | 0,1%        | 59,40%                                                | 70,7%                                    |
| 50000                                                            | 20%              | 10000               | 1                    | 0,01%                                                | 0,0%        | 0,1%        | 26,42%                                                | 100,0%                                   |
| 50000                                                            | 10%              | 5000                | 250                  | 5,00%                                                | 4,4%        | 5,6%        | 100,00%                                               | 6,2%                                     |
| 50000                                                            | 10%              | 5000                | 200                  | 4,00%                                                | 3,5%        | 4,6%        | 100,00%                                               | 6,9%                                     |
| 50000                                                            | 10%              | 5000                | 100                  | 2,00%                                                | 1,6%        | 2,4%        | 100,00%                                               | 9,9%                                     |
| 50000                                                            | 10%              | 5000                | 50                   | 1,00%                                                | 0,7%        | 1,3%        | 100,00%                                               | 14,1%                                    |
| 50000                                                            | 10%              | 5000                | 5                    | 0,10%                                                | 0,0%        | 0,2%        | 95,96%                                                | 44,7%                                    |
| 50000                                                            | 10%              | 5000                | 4,5                  | 0,09%                                                | 0,0%        | 0,2%        | 93,90%                                                | 47,1%                                    |
| 50000                                                            | 10%              | 5000                | 4                    | 0,08%                                                | 0,0%        | 0,2%        | 90,85%                                                | 50,0%                                    |
| 50000                                                            | 10%              | 5000                | 3,5                  | 0,07%                                                | 0,0%        | 0,2%        | 86,42%                                                | 53,4%                                    |
| 50000                                                            | 10%              | 5000                | 3                    | 0,06%                                                | 0,0%        | 0,2%        | 80,09%                                                | 57,7%                                    |
| 50000                                                            | 10%              | 5000                | 2,5                  | 0,05%                                                | 0,0%        | 0,2%        | 71,28%                                                | 63,2%                                    |
| 50000                                                            | 10%              | 5000                | 2                    | 0,04%                                                | 0,0%        | 0,1%        | 59,40%                                                | 70,7%                                    |
| 50000                                                            | 10%              | 5000                | 1,5                  | 0,03%                                                | 0,0%        | 0,1%        | 44,22%                                                | 81,6%                                    |
| 50000                                                            | 10%              | 5000                | 1                    | 0,02%                                                | 0,0%        | 0,1%        | 26,42%                                                | 100,0%                                   |
| 50000                                                            | 10%              | 5000                | 0,5                  | 0,01%                                                | 0,0%        | 0,1%        | 9,02%                                                 | 141,4%                                   |
| 50000                                                            | 5%               | 2500                | 125                  | 5,00%                                                | 4,2%        | 5,9%        | 100,00%                                               | 8,7%                                     |
| 50000                                                            | 5%               | 2500                | 100                  | 4,00%                                                | 3,3%        | 4,8%        | 100,00%                                               | 9,8%                                     |
| 50000                                                            | 5%               | 2500                | 50                   | 2,00%                                                | 1,5%        | 2,6%        | 100,00%                                               | 14,0%                                    |
| 50000                                                            | 5%               | 2500                | 25                   | 1,00%                                                | 0,6%        | 1,5%        | 100,00%                                               | 19,9%                                    |
| 50000                                                            | 5%               | 2500                | 12,5                 | 0,50%                                                | 0,3%        | 0,9%        | 100,00%                                               | 28,2%                                    |
| 50000                                                            | 5%               | 2500                | 2,5                  | 0,10%                                                | 0,0%        | 0,3%        | 71,29%                                                | 63,2%                                    |
| 50000                                                            | 5%               | 2500                | 2,25                 | 0,09%                                                | 0,0%        | 0,3%        | 65,76%                                                | 66,6%                                    |
| 50000                                                            | 5%               | 2500                | 2                    | 0,08%                                                | 0,0%        | 0,3%        | 59,41%                                                | 70,7%                                    |
| 50000                                                            | 5%               | 2500                | 1,75                 | 0,07%                                                | 0,0%        | 0,3%        | 52,22%                                                | 75,6%                                    |
| 50000                                                            | 5%               | 2500                | 1,5                  | 0,06%                                                | 0,0%        | 0,3%        | 44,22%                                                | 81,6%                                    |
| 50000                                                            | 5%               | 2500                | 1,25                 | 0,05%                                                | 0,0%        | 0,3%        | 35,54%                                                | 89,4%                                    |
| 50000                                                            | 5%               | 2500                | 1                    | 0,04%                                                | 0,0%        | 0,2%        | 26,42%                                                | 100,0%                                   |
| 50000                                                            | 5%               | 2500                | 0,75                 | 0,03%                                                | 0,0%        | 0,2%        | 17,33%                                                | 115,5%                                   |
| 50000                                                            | 5%               | 2500                | 0,5                  | 0,02%                                                | 0,0%        | 0,2%        | 9,02%                                                 | 141,4%                                   |
| 50000                                                            | 5%               | 2500                | 0,25                 | 0,01%                                                | 0,0%        | 0,2%        | 2,65%                                                 | 200,0%                                   |



1  
2  
3  
4 The cluster effect has not been taken into consideration in the calculation of the sample  
5 size. It may increase the relative standard error and thus decrease the precision around the  
6 proportions presented below. Nevertheless, this will be accounted for during the analysis.  
7  
8

9  
10 Table 1 shows the 95% CI, the probability of observing at least one AEI during the study period  
11 in the study cohort and the relative standard error (RSE) for a range of scenarios in term of  
12 cohort size, vaccine coverage and expected probability of AEI<sup>10</sup>. With an overall sample size of  
13 a minimum of about 50,000 subjects medically followed by the enrolled GP practices, a  
14 follow-up period of 14 weeks, a vaccine coverage of 5%, 10% or 20% and an expected  
15 probability of AEI varying from 0,01% to 20%, the corresponding probability to observe at  
16 least one event in our study population varies from 2% to 100%, and the associated relative  
17 standard error varies from 2.0% to 200% depending on the scenario.  
18  
19

20  
21  
22 Table 2 shows the evolution by week of the 95% CI, the cumulative probability of observing at  
23 least one AEI in the study cohort and the relative standard error (RSE) in the course of the  
24 study for a range of scenarios in term of cohort size, vaccine coverage and probability of AEI of  
25 1%. With an overall sample size of a minimum of about 50,000 subjects medically followed by  
26 the enrolled GP practices, a follow-up period of 14 weeks, a vaccine coverage of 5%, 10% or  
27 20%, the corresponding probability to observe at least one event in our study population  
28 varies from 53% to 99% after week 1, and the associated relative standard error varies from  
29 53% to 37% depending on the scenario.  
30  
31  
32  
33  
34  
35  
36  
37  
38  
39  
40  
41  
42  
43  
44  
45  
46  
47  
48  
49  
50  
51  
52  
53  
54  
55  
56  
57  
58  
59  
60



**Table 2 – Confidence intervals, Relative Standard Error cumulative probability to observe at least one AEI by week associated with a probability of occurrence of event of 1%**

| Week | Expected Population medically followed by the enrolled practices | Cumulative Vaccine coverage after 14 weeks | Cumulative number of Vaccinated subjects | Cumulative number of Subjects reported $\geq 1$ AEI | Average Proportion of AEI reported | Lower 95%CL | Upper 95%CL | Cumulative Probability to observe at least one event | Associated Relative standard error (RSE) |
|------|------------------------------------------------------------------|--------------------------------------------|------------------------------------------|-----------------------------------------------------|------------------------------------|-------------|-------------|------------------------------------------------------|------------------------------------------|
| 1    | 50000                                                            | 20%                                        | 714                                      | 7                                                   | 1,00%                              | 0,4%        | 2,0%        | 99,37%                                               | 37,2%                                    |
| 2    | 50000                                                            | 20%                                        | 1428                                     | 14                                                  | 1,00%                              | 0,5%        | 1,6%        | 100,00%                                              | 26,3%                                    |
| 3    | 50000                                                            | 20%                                        | 2142                                     | 21                                                  | 1,00%                              | 0,6%        | 1,5%        | 100,00%                                              | 21,5%                                    |
| 4    | 50000                                                            | 20%                                        | 2857                                     | 28                                                  | 1,00%                              | 0,7%        | 1,4%        | 100,00%                                              | 18,6%                                    |
| 5    | 50000                                                            | 20%                                        | 3571                                     | 35                                                  | 1,00%                              | 0,7%        | 1,4%        | 100,00%                                              | 16,7%                                    |
| 6    | 50000                                                            | 20%                                        | 4285                                     | 42                                                  | 1,00%                              | 0,7%        | 1,3%        | 100,00%                                              | 15,2%                                    |
| 7    | 50000                                                            | 20%                                        | 5000                                     | 50                                                  | 1,00%                              | 0,7%        | 1,3%        | 100,00%                                              | 14,1%                                    |
| 8    | 50000                                                            | 20%                                        | 5714                                     | 57                                                  | 1,00%                              | 0,8%        | 1,3%        | 100,00%                                              | 13,2%                                    |
| 9    | 50000                                                            | 20%                                        | 6428                                     | 64                                                  | 1,00%                              | 0,8%        | 1,3%        | 100,00%                                              | 12,4%                                    |
| 10   | 50000                                                            | 20%                                        | 7142                                     | 71                                                  | 1,00%                              | 0,8%        | 1,3%        | 100,00%                                              | 11,8%                                    |
| 11   | 50000                                                            | 20%                                        | 7857                                     | 78                                                  | 1,00%                              | 0,8%        | 1,2%        | 100,00%                                              | 11,2%                                    |
| 12   | 50000                                                            | 20%                                        | 8571                                     | 85                                                  | 1,00%                              | 0,8%        | 1,2%        | 100,00%                                              | 10,7%                                    |
| 13   | 50000                                                            | 20%                                        | 9285                                     | 92                                                  | 1,00%                              | 0,8%        | 1,2%        | 100,00%                                              | 10,3%                                    |
| 14   | 50000                                                            | 20%                                        | 10000                                    | 100                                                 | 1,00%                              | 0,8%        | 1,2%        | 100,00%                                              | 9,9%                                     |
| 1    | 50000                                                            | 10%                                        | 357                                      | 3                                                   | 1,00%                              | 0,2%        | 2,4%        | 87,26%                                               | 52,7%                                    |
| 2    | 50000                                                            | 10%                                        | 714                                      | 7                                                   | 1,00%                              | 0,4%        | 2,0%        | 99,37%                                               | 37,2%                                    |
| 3    | 50000                                                            | 10%                                        | 1071                                     | 10                                                  | 1,00%                              | 0,4%        | 1,7%        | 99,98%                                               | 30,4%                                    |
| 4    | 50000                                                            | 10%                                        | 1428                                     | 14                                                  | 1,00%                              | 0,5%        | 1,6%        | 100,00%                                              | 26,3%                                    |
| 5    | 50000                                                            | 10%                                        | 1785                                     | 17                                                  | 1,00%                              | 0,6%        | 1,5%        | 100,00%                                              | 23,6%                                    |
| 6    | 50000                                                            | 10%                                        | 2142                                     | 21                                                  | 1,00%                              | 0,6%        | 1,5%        | 100,00%                                              | 21,5%                                    |
| 7    | 50000                                                            | 10%                                        | 2500                                     | 25                                                  | 1,00%                              | 0,6%        | 1,5%        | 100,00%                                              | 19,9%                                    |
| 8    | 50000                                                            | 10%                                        | 2857                                     | 28                                                  | 1,00%                              | 0,7%        | 1,4%        | 100,00%                                              | 18,6%                                    |
| 9    | 50000                                                            | 10%                                        | 3214                                     | 32                                                  | 1,00%                              | 0,7%        | 1,4%        | 100,00%                                              | 17,6%                                    |
| 10   | 50000                                                            | 10%                                        | 3571                                     | 35                                                  | 1,00%                              | 0,7%        | 1,4%        | 100,00%                                              | 16,7%                                    |
| 11   | 50000                                                            | 10%                                        | 3928                                     | 39                                                  | 1,00%                              | 0,7%        | 1,4%        | 100,00%                                              | 15,9%                                    |
| 12   | 50000                                                            | 10%                                        | 4285                                     | 42                                                  | 1,00%                              | 0,7%        | 1,3%        | 100,00%                                              | 15,2%                                    |
| 13   | 50000                                                            | 10%                                        | 4642                                     | 46                                                  | 1,00%                              | 0,7%        | 1,3%        | 100,00%                                              | 14,6%                                    |
| 14   | 50000                                                            | 10%                                        | 5000                                     | 50                                                  | 1,00%                              | 0,7%        | 1,3%        | 100,00%                                              | 14,1%                                    |
| 1    | 50000                                                            | 5%                                         | 178                                      | 1                                                   | 1,00%                              | 0,0%        | 3,1%        | 53,24%                                               | 74,6%                                    |
| 2    | 50000                                                            | 5%                                         | 357                                      | 3                                                   | 1,00%                              | 0,2%        | 2,4%        | 87,26%                                               | 52,7%                                    |
| 3    | 50000                                                            | 5%                                         | 535                                      | 5                                                   | 1,00%                              | 0,3%        | 2,2%        | 97,04%                                               | 43,0%                                    |
| 4    | 50000                                                            | 5%                                         | 714                                      | 7                                                   | 1,00%                              | 0,4%        | 2,0%        | 99,37%                                               | 37,2%                                    |
| 5    | 50000                                                            | 5%                                         | 892                                      | 8                                                   | 1,00%                              | 0,4%        | 1,8%        | 99,87%                                               | 33,3%                                    |
| 6    | 50000                                                            | 5%                                         | 1071                                     | 10                                                  | 1,00%                              | 0,4%        | 1,7%        | 99,98%                                               | 30,4%                                    |
| 7    | 50000                                                            | 5%                                         | 1250                                     | 12                                                  | 1,00%                              | 0,5%        | 1,7%        | 100,00%                                              | 28,1%                                    |
| 8    | 50000                                                            | 5%                                         | 1428                                     | 14                                                  | 1,00%                              | 0,5%        | 1,6%        | 100,00%                                              | 26,3%                                    |
| 9    | 50000                                                            | 5%                                         | 1607                                     | 16                                                  | 1,00%                              | 0,6%        | 1,6%        | 100,00%                                              | 24,8%                                    |
| 10   | 50000                                                            | 5%                                         | 1785                                     | 17                                                  | 1,00%                              | 0,6%        | 1,5%        | 100,00%                                              | 23,6%                                    |
| 11   | 50000                                                            | 5%                                         | 1964                                     | 19                                                  | 1,00%                              | 0,6%        | 1,5%        | 100,00%                                              | 22,5%                                    |
| 12   | 50000                                                            | 5%                                         | 2142                                     | 21                                                  | 1,00%                              | 0,6%        | 1,5%        | 100,00%                                              | 21,5%                                    |
| 13   | 50000                                                            | 5%                                         | 2321                                     | 23                                                  | 1,00%                              | 0,6%        | 1,5%        | 100,00%                                              | 20,7%                                    |
| 14   | 50000                                                            | 5%                                         | 2500                                     | 25                                                  | 1,00%                              | 0,6%        | 1,5%        | 100,00%                                              | 19,9%                                    |

#### Data sources

In this passive enhanced safety surveillance, there are two data sources. General practice EHR data, providing passive surveillance, with ADR cards completed by patients providing the

1  
2  
3  
4 enhanced component. The ADR cards are being returned to the patient's own practice to  
5 ensure confidentiality. The data from these cards would also be coded into the EHR and  
6 uploaded weekly (Figure 1).  
7  
8

- 9  
10 1. General Practice EHR data recorded by the practice team. Weekly data about vaccine  
11 exposure, and any subsequent AEs will be uploaded (anonymised) to the University of  
12 Surrey. The EHR data contains both AEs recorded by the practice team, as well as  
13 data reported to the practice on an ADR by a vaccinated patient.  
14  
15  
16 2. ADR cards completed by patients. Among the 10 participating GP practices, patients  
17 who are vaccinated against influenza will be provided ADR cards. These ADR cards,  
18 customised following practice feedback to match EMA requirements, to collect AEs  
19 reported after the receipt of influenza vaccination.  
20  
21  
22

23 These data, originating from the two sources (patient completed ADR card, or practice  
24 recorded) will be then imported (anonymised) into the secure servers of the University of  
25 Surrey. The final dataset will therefore combine data routinely collected for all patients  
26 registered with the 10 participating sites and data collected from the ADR cards and encoded  
27 during the 2016/17 influenza season. In addition to the adverse event data, we will extract  
28 demographics, vaccination status, and relevant comorbidities.  
29  
30  
31

32  
33 We will only extract coded data, i.e. where the GP or other health professional codes a disease  
34 or symptom into the EHR system<sup>11</sup>. The overwhelming majority of the large volume of  
35 research that has come out of UK primary care is based on coded data<sup>12</sup>. The richness of  
36 primary care data are such that we anticipate being able to detect important AEs<sup>13</sup>. We will  
37 request practices to use the relevant Read code for ADR notifications, when recording data  
38 from a returned card (Read Code: 9G4 Adverse drug reaction notification).  
39  
40  
41

#### 42 **Data analyses**

43 We will interpret coded data by the creation of ontologies that we will map to case-  
44 definitions, where available. However, we do not have the in depth descriptions required for  
45 case definition found, for example, in clinical trials. We will be inferring meaning from brief  
46 clinical coded information, though we have considerable experience of this and will have the  
47 opportunity to confirm with practices and practitioners how to interpret their clinical records.  
48  
49  
50

51  
52 Statistical analysis will consist primarily of descriptive statistics: rates and proportions for  
53 categorical data and summary statistics for continuous variables. Confidence intervals will be  
54 calculated; however, due to the effects of clustering and practice differences in this  
55 relatively small pilot these are likely to be wide. All statistical analysis will be conducted using  
56  
57  
58  
59  
60

R Studio.

#### *Analyses of the primary objective*

All analyses will be carried out by overall, by brand (Fluarix tetra vs. others), by age strata (6 months to 5 years; 6 to 12 years; 13 to 17 years; 18-65 years; >65), and CMO-specified risk groups.

To estimate on a weekly basis the crude incidence rate of AEs within 7 days

- o The denominator will consist of the number vaccinated subjects receiving a vaccination card and reaching 7 days of follow-up post vaccination during the week of interest and cumulatively since the beginning of the study.
- o The numerator will encompass all vaccinated subjects reporting at least one AEI within 7 days following vaccination with a seasonal influenza vaccine

## **ETHICS AND DISSEMINATION**

### *Ethical review*

'Defining Research' (<http://www.hra.nhs.uk/documents/2013/09/defining-research.pdf>), the National Research Ethics Service (NRES) guidance suggests that surveillance does not require formal review by a Research Ethics Committee. The research team will however sought an opinion from the NRES's Proportional Review system to check if formal approval from a NHS Research Ethics Committee (REC) is needed prior to the commencement of the study, as well as Section 251 approval. Ethical approval was granted by the Proportionate Review Subcommittee of the North East - Newcastle & North Tyneside 2 REC on 05/08/2016 (REC reference: 16/NE/0271). Section 251 application was not deemed necessary by the Health Research Authority (HRA) and the study received approval on 01/09/2016 (IRAS ID: 211560).

### *Data extraction and data management*

The method and governance procedure has been developed by the University of Surrey, using an approved provider, Apollo Medical Software Solutions Ltd. Alternatively, we will use another approved data extraction supplier, or securely extract the relevant study data ourselves using standard data extraction tools such as Morbidity Information Query Export Syntax (MIQUEST), a Department of Health sponsored data extract tool. Data extractions will be conducted in accordance with the Research Group's standard operating procedures in data extraction, pseudonymisation, and transfer.

All data are strongly encrypted by a combination of symmetric and asymmetric encryption algorithms: Triple DES<sup>1</sup> and RSA 1024<sup>2</sup> before transmission, and utilises public and private

---

<sup>1</sup> This is also referred to as "3DES", which is the commonly used name for the triple data encryption algorithm (TDEA, also written Triple DEA) symmetric-key block cipher.

1  
2  
3  
4 key pairs unique to each project. Data are pseudonymised as near to source as possible.  
5 Pseudonymisation is applied at this stage to allow for backwards identification should there be  
6 a need to do so as part of an ethically approved study.  
7  
8

9  
10 Pseudonymisation is a process that involves the removal of all personal identifiers from data  
11 – such as name, date of birth, etc. However, there is a risk that if data are linked to other  
12 data a person might be identified<sup>14</sup>. Therefore although all identifiers are removed we keep  
13 data encrypted during transfer and on a secure network that meets NHS Information  
14 Governance standards to minimise the risk of re-identification. Pseudonymisation is the  
15 standard approach for this type of surveillance. A legally binding definition of  
16 pseudonymisation has been introduced into European law<sup>15</sup> on the recommendation of the  
17 European Data Protection Supervisor (EDPS)<sup>16</sup>.  
18  
19  
20  
21

22 All data processing and analysis in the present proposed study will be conducted within the  
23 secure IT environment of the Clinical Informatics Research Group, at the University of Surrey.  
24 The information security policies and procedures of the Research Group have been approved  
25 by the NHS Health and Social Care Information Centre (HSCIC) as meeting Information  
26 Governance Toolkit (IGT) standards<sup>17</sup>. The University of Surrey is registered with the  
27 Information Commissioner's Office Data Protection Register, and is compliant with the Data  
28 Protection Act, and other legislations.  
29  
30  
31

32  
33 In line with the principle of the Data Protection Act 1998, data subjects will be informed of  
34 the uses of their data in this study. Participating GP practices will be asked to display project  
35 information in their website, and project information posters in reception areas, from when  
36 the practice has consented to take part in the study and until the study is completed. We will  
37 respect the codes in the data indicating that a patient does not wish to have their record  
38 available for research; we will, however, seek to report the number of patients within a  
39 practice who have chosen to opt out.  
40  
41  
42

43 No Personally Identifiable Information (PII) such as NHS numbers, postcodes, dates of birth,  
44 etc. will be available to GSK, third parties, or disclosed in publications. Additionally, no patient  
45 level data will be sent to GSK to remove any possibility that any individual patient might be re-  
46 identified. GSK will also be blinded to practice identities, and the locality at which any AEI  
47 occurs; other than where the patient gives consent, or their own chooses to report any  
48 condition in line with best practice.  
49  
50  
51

52  
53 *Safety reporting, including routine pharmacovigilance*  
54

---

55  
56 <sup>2</sup> RSA stands for Rivest, Shamir and Aldeman who founded RSA Laboratories. They created large numbers with only  
57 two prime factors, a core component of the encryption process.  
58  
59  
60

1  
2  
3  
4 This study's primary endpoints are safety-related. However, it will be clearly communicated to  
5 participating practices that the study does not replace AEI reporting that would occur as part  
6 of routine practice. If a GP felt an AEI merited reporting they should do so in whatever way  
7 they would generally do so. If the team at the University of Surrey becomes aware of a serious  
8 adverse event (SAE) experienced by a study participant, the SAE should be reported to GSK  
9 within 24 hours of awareness, in writing. An SAE is defined as any untoward medical  
10 occurrence that:  
11  
12  
13

- 14 • Results in death,
- 15 • Life-threatening (where the participant is at risk of death),
- 16 • Requires hospitalization or prolongation of existing hospitalization,
- 17 • Results in disability/incapacity (where there is a substantial disruption of a person's  
18 ability to conduct normal life functions)..
- 19 • Important medical events -events that may not be immediately life-threatening or  
20 result in death or hospitalization but may jeopardize the study participant or may  
21 require medical or surgical intervention to prevent one of the other outcomes listed in  
22 the above definition.  
23  
24  
25  
26  
27  
28

#### 29 *Dissemination and Public Register Disclosure*

30 The outputs from the research will be disseminated primarily through peer review papers in  
31 high impact journals within the domains of primary care, surveillance, vaccines, and infectious  
32 diseases<sup>18 19</sup>. We will present findings at relevant seminars and conferences. The University of  
33 Surrey, in accordance with GSK policy, will post a summary of the study protocol and results  
34 within 12 months of study completion and following review and comment by GSK on GSK's  
35 Clinical Study Register, accessible at <http://www.gsk-clinicalstudyregister.com> and at  
36 www.clinicaltrials.gov.  
37  
38  
39  
40

#### 41 **AUTHOR CONTRIBUTIONS**

##### 42 **SdeL**

43 Simon de Lusignan developed the study design, and is the main writer of the protocol.  
44  
45  
46  
47

##### 48 **GDS**

49 Gaël Dos Santos helped with the study design development, and contributed to the writing.  
50  
51

##### 52 **AC**

53 Ana Correa contributed to the methods and analysis section of this protocol.  
54  
55

##### 56 **FH**

1  
2  
3  
4 François Haguinet contributed to the sample size and analysis section of this protocol.  
5  
6

7 **IY**

8 Ivelina Yonova helped develop the practice recruitment methods, and contributed to writing  
9 the protocol.  
10

11  
12 **FL**

13 Florence Lair reviewed the protocol, and contributed to the writing.  
14

15  
16 **RB**

17 Rachel Byford helped develop the data flow structure, and contributed to writing the protocol.  
18  
19

20  
21 **FF**

22 Filipa Ferreira extensively reviewed the protocol, and contributed to the writing.  
23  
24

25  
26 **KS**

27 Karen Stuttard reviewed the protocol, and contributed to the writing.  
28

29  
30 **TC**

31 Tom Chan contributed to the ethical implications and background section of this protocol.  
32

33 **FUNDING STATEMENT**

34 GlaxoSmithKline Biologicals SA was the funding source and was involved in study design and  
35 interpretation, study number 202056.  
36  
37

38 **COMPETING INTERESTS STATEMENT**

39 SdeL and AC participate in a European consortium called IMOVE+ funded by Horizon 2020 to  
40 monitor seasonal influenza vaccine effectiveness across Europe.  
41  
42

43 GDS reports he was employed by Business & Decision Life Sciences on behalf of GSK Vaccines  
44 at the time of the study and is now employed by the GSK group of companies. NM and FH are  
45 employees of the GSK group of companies. GDS and NM hold shares in the GSK group of  
46 companies as part of their employee remuneration.  
47  
48

49  
50 **DATA SHARING STATEMENT**

51 Once the study is completed, we will publish all relevant aggregated results. Unpublished  
52 aggregated results could be made available, upon request, by the authors.  
53  
54  
55  
56  
57  
58  
59  
60



## REFERENCES

- <sup>1</sup> European Medicines Agency (EMA) Pharmacovigilance Risk Assessment Committee (PRAC). Interim guidance on enhanced safety surveillance for seasonal influenza vaccines in the EU. London, EMA: Ref: EMA/PRAC/222346/2014; 10 April 2014. URL: [http://www.ema.europa.eu/docs/en\\_GB/document\\_library/Scientific\\_guideline/2014/04/WC500165492.pdf](http://www.ema.europa.eu/docs/en_GB/document_library/Scientific_guideline/2014/04/WC500165492.pdf)
- <sup>2</sup> European Medicines Agency (EMA). Explanatory note on the withdrawal of the note for guidance on harmonization of requirements for influenza vaccines and of the core SmPC/PL for inactivated seasonal influenza vaccines. London: EMA; 2014. Contract No.: EMA/CHMP/VWP/40560/2014. Available from: [http://www.ema.europa.eu/ema/index.jsp?curl=pages/includes/document/document\\_detail.jsp?webContentId=WC500161022&mid=WC0b01ac058009a3dc](http://www.ema.europa.eu/ema/index.jsp?curl=pages/includes/document/document_detail.jsp?webContentId=WC500161022&mid=WC0b01ac058009a3dc)
- <sup>3</sup> Correa, A., Hinton, W., McGovern, A., van Vlymen, J., Yonova, I., Jones, S., de Lusignan, S. Cohort profile: Royal College of General Practitioners Research and Surveillance Centre (RCGP RSC) sentinel network. *BMJ Open* 2016;6:e011092. doi:10.1136/bmjopen-2016-011092
- <sup>4</sup> Royal College of General Practitioners (RCGP) Research and Surveillance Centre (RSC). URL: <http://www.rcgp.org.uk/clinical-and-research/our-programmes/research-and-surveillance-centre.aspx>
- <sup>5</sup> Public Health England, Department of Health, NHS England. Flu plan Winter 2015/16. 2015. PHE publications gateway number: 2014833. URL: [https://www.gov.uk/government/uploads/system/uploads/attachment\\_data/file/418038/Flu\\_Plan\\_Winter\\_2015\\_to\\_2016.pdf](https://www.gov.uk/government/uploads/system/uploads/attachment_data/file/418038/Flu_Plan_Winter_2015_to_2016.pdf)
- <sup>6</sup> National Institute for Health Research Clinical Research Network. Guide to the NIHR CRN Industry Costing Template: Costing Industry Sponsored Studies (version: April 2014). URL: <https://www.crn.nihr.ac.uk/wp-content/uploads/Industry/GUIDE%20to%20Industry%20Costing%20Template-APRIL2014.pdf>
- <sup>7</sup> David A. Asch M.Kathryn Jedrzejewski, Nicholas A. Christakis, Response rates to mail surveys published in medical journals *Journal of Clinical Epidemiology* Volume 50, Issue 10, October 1997, Pages 1129–1136
- <sup>8</sup> Workforce and Facilities Team, Health and Social Care Information Centre. General and Personal Medical Services: England 2003-13. 25 March 2014. URL: <http://www.hscic.gov.uk/catalogue/PUB13849/nhs-staf-2003-2013-gene-prac-rep.pdf>
- <sup>9</sup> Public Health England. Vaccine uptake guidance and the latest coverage data. <https://www.gov.uk/government/collections/vaccine-uptake#seasonal-flu-vaccine-uptake>
- <sup>10</sup> Clopper CJ, Pearson ES. The use of confidence or fiducial limits illustrated in the case of binomial. *Biometrika*. 1934; 26:404-413
- <sup>11</sup> de Lusignan S. Codes, classifications, terminologies and nomenclatures: definition, development and application in practice. *Inform Prim Care*. 2005;13(1):65-70.
- <sup>12</sup> Kousoulis AA, Rafi I, de Lusignan S. The CPRD and the RCGP: building on research success by enhancing benefits for patients and practices. *Br J Gen Pract*. 2015 Feb;65(631):54-5. doi: 10.3399/bjgp15X683353.
- <sup>13</sup> de Lusignan S, van Weel C. The use of routinely collected computer data for research in primary care: opportunities and challenges. *Fam Pract*. 2006;23(2):253-63.
- <sup>14</sup> National Health Service (NHS). Pseudonymisation and anonymisation of data policy (last reviewed: 27 April 2015), accessed 09/06/2016. URL: [http://www.google.fr/url?url=http://www.nhsbsa.nhs.uk/Documents/NHSBSACorporatePoliciesandProcedures/Pseudonymisation\\_and\\_Anonymisation\\_of\\_Data\\_Policy.doc&rct=j&frm=1&q=&esrc=s&sa=U&ved=0ahUKewjZrQpVz4fNAhWEB8AKHU0IBz4QFggUMAA&usg=AFQjCNF-JPX5zueirRIBylzoF-WAEDNkmg](http://www.google.fr/url?url=http://www.nhsbsa.nhs.uk/Documents/NHSBSACorporatePoliciesandProcedures/Pseudonymisation_and_Anonymisation_of_Data_Policy.doc&rct=j&frm=1&q=&esrc=s&sa=U&ved=0ahUKewjZrQpVz4fNAhWEB8AKHU0IBz4QFggUMAA&usg=AFQjCNF-JPX5zueirRIBylzoF-WAEDNkmg)
- <sup>15</sup> European Union. Justice. Reform of EU data protection rules. URL: [http://ec.europa.eu/justice/data-protection/reform/index\\_en.htm](http://ec.europa.eu/justice/data-protection/reform/index_en.htm)
- <sup>16</sup> EUR-lex. EDPS recommendations on the EU's options for data protection reform. URL: [http://eur-lex.europa.eu/legal-content/EN/TXT/?uri=CELEX%3A52015XX0912\(01\)#ntc14-C\\_2015301EN.01000101-E0014](http://eur-lex.europa.eu/legal-content/EN/TXT/?uri=CELEX%3A52015XX0912(01)#ntc14-C_2015301EN.01000101-E0014)
- <sup>17</sup> Health and Social Care Information Centre (HSCIC). Information Governance Toolkit (IGT). URL: <https://www.igt.hscic.gov.uk/>
- <sup>18</sup> MRC Policy and Guidance on Sharing of Research Data from Population and Patient Studies (Sept 2011) <http://www.mrc.ac.uk/Ourresearch/Ethicsresearchguidance/datasharing/Policy/index.htm>
- <sup>19</sup> Economic Co-operation and Development (OECD). "Promoting Access to Public Research Data for Scientific, Economic and Social Development" 2007 <http://www.oecd.org/sti/sci-tech/38500813.pdf>

1  
2  
3  
4  
5  
6  
7  
8  
9  
10  
11  
12  
13  
14  
15  
16  
17  
18  
19  
20  
21  
22  
23  
24  
25  
26  
27  
28  
29  
30  
31  
32  
33  
34  
35  
36  
37  
38  
39  
40  
41  
42  
43  
44  
45  
46  
47  
48  
49  
50  
51  
52  
53  
54  
55  
56  
57  
58  
59  
60

Flow chart 4: Data capture flow chart – patient flu vaccinated in the surgery



156x231mm (96 x 96 DPI)



# BMJ Open

## Post-authorisation passive enhanced safety surveillance of seasonal influenza vaccines: Protocol of a pilot study in England

|                                 |                                                                                                                                                                                                                                                                                                                                                                                                                                                                                                                                                                                                                                                                                                                                                |
|---------------------------------|------------------------------------------------------------------------------------------------------------------------------------------------------------------------------------------------------------------------------------------------------------------------------------------------------------------------------------------------------------------------------------------------------------------------------------------------------------------------------------------------------------------------------------------------------------------------------------------------------------------------------------------------------------------------------------------------------------------------------------------------|
| Journal:                        | <i>BMJ Open</i>                                                                                                                                                                                                                                                                                                                                                                                                                                                                                                                                                                                                                                                                                                                                |
| Manuscript ID                   | bmjopen-2016-015469.R2                                                                                                                                                                                                                                                                                                                                                                                                                                                                                                                                                                                                                                                                                                                         |
| Article Type:                   | Protocol                                                                                                                                                                                                                                                                                                                                                                                                                                                                                                                                                                                                                                                                                                                                       |
| Date Submitted by the Author:   | 24-Mar-2017                                                                                                                                                                                                                                                                                                                                                                                                                                                                                                                                                                                                                                                                                                                                    |
| Complete List of Authors:       | de Lusignan, Simon; University of Surrey, Department of Clinical and Experimental Medicine<br>Dos Santos, Gaël; GlaxoSmithKline Vaccines<br>Correa, Ana; University of Surrey, Department of Clinical and Experimental Medicine<br>Haguinet, François; GlaxoSmithKline Vaccines<br>Yonova, Ivelina; University of Surrey, Department of Clinical and Experimental Medicine<br>Lair, Florence; GlaxoSmithKline Vaccines<br>Byford, Rachel; University of Surrey, Department of Clinical and Experimental Medicine<br>Ferreira, Filipa; University of Surrey, Department of Clinical and Experimental Medicine<br>Stuttard, Karen; GlaxoSmithKline Vaccines<br>Chan, Tom; University of Surrey, Department of Clinical and Experimental Medicine |
| <b>Primary Subject Heading</b>: | Epidemiology                                                                                                                                                                                                                                                                                                                                                                                                                                                                                                                                                                                                                                                                                                                                   |
| Secondary Subject Heading:      | General practice / Family practice, Infectious diseases, Epidemiology, Research methods, Health policy                                                                                                                                                                                                                                                                                                                                                                                                                                                                                                                                                                                                                                         |
| Keywords:                       | EPIDEMIOLGY, Public health < INFECTIOUS DISEASES, BIOTECHNOLOGY & BIOINFORMATICS, PREVENTIVE MEDICINE, PRIMARY CARE, Adverse events < THERAPEUTICS                                                                                                                                                                                                                                                                                                                                                                                                                                                                                                                                                                                             |
|                                 |                                                                                                                                                                                                                                                                                                                                                                                                                                                                                                                                                                                                                                                                                                                                                |

SCHOLARONE™  
Manuscripts

**Post-authorisation passive enhanced safety surveillance of seasonal influenza vaccines:  
Protocol of a pilot study in England**

**Simon de Lusignan**

(Principal Investigator)\*<sup>1</sup>

Professor of Primary Care and Clinical Informatics

Chair in Health Care Management,

University of Surrey

[s.lusignan@surrey.ac.uk](mailto:s.lusignan@surrey.ac.uk)

+44 0 1483 684802

**Gaël Dos Santos**

Epidemiologist, Global Epidemiology<sup>2</sup>

[gael.x.dos-santos@gsk.com](mailto:gael.x.dos-santos@gsk.com)

**Ana Correa**

Primary Care Scientist<sup>1</sup>

Department of Clinical and Experimental Medicine, University of Surrey

[a.correa@surrey.ac.uk](mailto:a.correa@surrey.ac.uk)

**François Haguinet**

Bio-Statistician, Global Epidemiology<sup>2</sup>

[francois.f.haguinet@gsk.com](mailto:francois.f.haguinet@gsk.com)

**Ivelina Yonova**

Practice Liaison Officer<sup>1</sup>

Department of Clinical and Experimental Medicine, University of Surrey

[i.yonova@surrey.ac.uk](mailto:i.yonova@surrey.ac.uk)

**Florence Lair**

Study Delivery Lead<sup>2</sup>

[florence.x.lair@gsk.com](mailto:florence.x.lair@gsk.com)

**Rachel Byford**

Senior Database Developer<sup>1</sup>

Department of Clinical and Experimental Medicine, University of Surrey

[r.byford@surrey.ac.uk](mailto:r.byford@surrey.ac.uk)

**Filipa Ferreira**

Programme Manager<sup>1</sup>

Department of Clinical and Experimental Medicine, University of Surrey

[f.ferreira@surrey.ac.uk](mailto:f.ferreira@surrey.ac.uk)

**Karen Stuttard**Local Delivery Lead<sup>2</sup>[karen.e.stuttard@gsk.com](mailto:karen.e.stuttard@gsk.com)**Tom Chan**Senior Research Fellow<sup>1</sup>

Department of Clinical and Experimental Medicine, University of Surrey

[t.chan@surrey.ac.uk](mailto:t.chan@surrey.ac.uk)<sup>1</sup>Department of Clinical and Experimental Medicine

University of Surrey

Guildford

Surrey GU2 7XH

UK

W: [www.clininf.eu](http://www.clininf.eu)<sup>2</sup>GSK Vaccines

Rue de l'Institut 89

1330 Rixensart

Belgium

Word count: 4106

1  
2  
3  
4 **Post-authorisation passive enhanced safety surveillance of seasonal influenza vaccines:**  
5 **Protocol of a pilot study in England**  
6

7  
8 **ABSTRACT**  
9

10  
11 *Aim:*

12 To pilot enhanced safety surveillance of seasonal influenza vaccine meeting the European  
13 Medicines Agency (EMA) requirement to rapidly detect a significant increase in the frequency  
14 or severity of adverse events of interest (AEIs), which may indicate risk from the new season's  
15 vaccine.  
16

17  
18  
19 *Study design:* A prospective passive enhanced safety surveillance combining data collection  
20 from adverse drug reaction (ADR) cards with automated collection of pseudonymised routinely  
21 collected electronic health record (EHR) data. This study builds on a feasibility study carried out  
22 at the start of the 2015/2016 flu season. We will report flu vaccine exposure and any AEIs  
23 reported via ADR card or recorded directly into the EHR, from the commencement of influenza  
24 vaccination and ends as specified by EMA (30<sup>th</sup> November, 2016).  
25  
26

27  
28 *Setting:* Ten volunteer English general practices, primarily using the GSK influenza vaccines.  
29 They had selected this vaccine in advance of the study.  
30

31  
32 *Participants:* People who receive a seasonal influenza vaccine, in each age-group defined in  
33 EMA interim guidance: 6months to 5years; 6-12 years; 13-17 years; 18-65 years; and >65years  
34 old.  
35  
36

37  
38 *Outcome measures:*

39 The primary outcome measure is the rate of AEIs occurring within 7 days post-vaccination,  
40 using passive surveillance of GP electronic health record (EHR) systems enhanced by a card-  
41 based ADR reporting system. Extracted data will be presented overall, by brand (Fluarix Tetra  
42 vs. others), by age strata, and risk groups. The secondary outcome measure is the vaccine  
43 uptake among the subjects registered in the enrolled GP practices.  
44  
45

46  
47 *Ethics and dissemination:*

48 Ethical approval was granted by the Proportionate Review Sub-committee of the North East -  
49 Newcastle & North Tyneside 2 on 05/08/2016. The study received approval from the Health  
50 Research Authority on 01/09/2016. We will produce an interim analysis within 8 weeks, and an  
51 end of study report, which will submitted to peer-reviewed journals.  
52  
53  
54  
55  
56  
57  
58  
59  
60

1  
2  
3  
4  
5  
6  
7  
8  
9  
10  
11  
12  
13  
14  
15  
16  
17  
18  
19  
20  
21  
22  
23  
24  
25  
26  
27  
28  
29  
30  
31  
32  
33  
34  
35  
36  
37  
38  
39  
40  
41  
42  
43  
44  
45  
46  
47  
48  
49  
50  
51  
52  
53  
54  
55  
56  
57  
58  
59  
60

For peer review only

## STRENGTHS AND LIMITATIONS

### *Strengths*

- This study sets out the first methods for near real time enhanced passive surveillance of seasonal influenza vaccine using routinely collected data.
- Customised adverse drug reaction cards may enhance reporting over standard passive surveillance, which may result in under-reporting of less severe symptoms not requiring medical attendance.
- The methods outlined in this study have the potential to be expanded to other brands.
- The practice recruitment is intended to have wide and representative coverage of England.
- The data of the participating patients will be thoroughly protected by means of a pseudonymising algorithm that allowed removal of strong identifiers.

### *Limitations*

- This feasibility study has not been powered or designed to detect rare events or detect significant statistical differences of adverse event rates across brands.
- We are also exploring the feasibility of using rates of adverse events in non-vaccinated patients as a basis for comparison.

## INTRODUCTION

### *EMA guidance*

In response to a recent expansion of national vaccination programmes in EU member states, the European Medicines Agency has released interim guidance on enhanced safety surveillance for seasonal influenza vaccines in the EU<sup>1</sup>. This set out new standards for surveillance that all Marketing Authorisation Holders (MAHs) providing vaccines in the EU must address. The key objective of the EMA enhanced safety surveillance is to rapidly detect a significant increase in the frequency and/or severity of expected reactions (local, systemic or allergic reactions) that may indicate a potential or more serious risk, as exposure to the vaccine increases.

Since 2015, European regulatory requirements to evaluate the safety and immunogenicity of seasonal influenza vaccines in small scale clinical trials were withdrawn<sup>2</sup>. Such trials had insufficient power to adequately evaluate safety concerns arising from annual formulation changes (e.g. adverse events occurring at a rate of 1–2%). These clinical trials are to be replaced by enhanced, preferably active, safety monitoring and vaccine effectiveness assessments.

The EMA Interim Guidance on enhanced safety surveillance for seasonal influenza vaccines in the EU suggested that there would be 3 options envisioned for enhanced surveillance:

- *Enhanced Active surveillance (post authorisation safety studies (PASS))*: Active follow-up of a cohort of children and adults for 7 days after immunisation for reactogenicity endpoints/adverse events.
- *Enhanced Passive Surveillance*: Rapidly estimate vaccine usage and facilitate adverse drug reaction (ADR) reporting, in order to determine reporting rate as a surrogate of incidence of the adverse events of interest (AEIs).
- *Data mining* or other use of electronic health record/ computerised medical record.

We opted for enhanced passive surveillance because, whilst highly computerised medical records system maximise the likelihood of reliably capturing the AEIs, we felt this needed enhancement through the use of customised ADR cards. These cards were pre-printed with the categories of possible adverse events to facilitate the reporting and the subsequent coding of events. They also contained a specific tick box when no AEIs were experienced leading to a reasonably acceptable return rate.

We expect that, by enhancing surveillance with a customised card and encouraging patients to directly report their symptoms, we will more reliably detect a greater number of events. The

1  
2  
3  
4 proposed approach was designed to meet the EMA enhanced passive surveillance definition.  
5  
6

7 The present collaborative pilot study between MAH GlaxoSmithKline Biologicals (GSK) and the  
8 Clinical Informatics and Health Outcomes Research Group at the University of Surrey builds  
9 on the lessons learned from the pilot study (EPI-FLU-045 VS UK) implemented during the  
10 2014/2015 influenza season and aims to address the EMA commitment for enhanced safety  
11 surveillance of seasonal vaccines in Europe. We will begin data collection on September 1<sup>st</sup>,  
12 2016, and the analysis will be completed on March 31<sup>st</sup>, 2017.  
13  
14

15  
16 The EPI-FLU-045 VS UK pilot study showed that the proposed surveillance setting in the UK  
17 was suitable to rapidly detect and evaluate potential new safety concerns each influenza  
18 season. The primary purpose of the 2016/17 pilot study is to improve the combination of an  
19 ADR card-based system and the use of routine data to collect adverse events following  
20 vaccination with seasonal influenza vaccines.  
21  
22

#### 23 24 25 *The RCGP RSC network*

26 The Clinical Informatics Research Group, in the Department of Clinical and Experimental  
27 Medicine (DCEM) at the University of Surrey is the home of the data and analysis hub for the  
28 Royal College of General Practitioners Research and Surveillance Centre (RCGP RSC). The  
29 RCGP RSC provides a national primary care surveillance system and is supported by Public  
30 Health England (PHE). The RCGP RSC network of practices has a membership designed to give  
31 representative coverage of 1.5%-2% of the English population<sup>3</sup>. The RCGP RSC has been  
32 described as the gold standard sentinel network.  
33  
34  
35

36  
37 The most important work of the RCGP RSC network is its influenza surveillance; many practices  
38 have been involved in this work for decades<sup>4</sup>. Data are uploaded from the network on a  
39 weekly basis to a secure sever, with the possibility to switch the frequency of the release to a  
40 twice weekly upload during epidemics. The methods developed by the University of Surrey will  
41 be used in this passive enhanced safety surveillance study, with a focus on reporting on  
42 adverse events.  
43  
44

#### 45 46 47 *Seasonal influenza vaccination in England*

48 Seasonal influenza vaccines present several specific challenges for pharmacovigilance. These  
49 include immunisation in large population cohorts in a relatively short and fixed time period  
50 each year, and multiplicity of vaccine products on the market with the need to conduct  
51 product-specific safety surveillance. In the UK, the 2015/2016 influenza plan recommended the  
52 following groups to be vaccinated<sup>5</sup>:  
53

- 54 • People aged 65 years or over (based on age on 31 March, 2016)
- 55 • People aged from 6 months to less than 65 years of age with a medical condition:  
56  
57  
58  
59  
60



- chronic (long-term) respiratory disease, such as severe asthma
  - chronic obstructive pulmonary disease (COPD) or bronchitis
  - chronic heart disease, such as heart failure
  - chronic kidney disease, stages 3-5
  - chronic liver disease
  - chronic neurological disease, such as Parkinson's disease or motor neurone disease, or a learning disability
  - diabetes
  - splenic dysfunction
  - immunocompromised due to disease (such as HIV/AIDS) or treatment (such as cancer treatment)
- All pregnant women (including those women who become pregnant during the flu season)
  - All those aged 2, 3, and 4 years (but not 5 years or older) on 31 August, 2015 (i.e. date all children of school years 1 and 2 age through locally commissioned arrangements).
  - Primary school-aged children in areas that participated in primary school pilots in 2014/15.
  - People living in long-stay residential care homes or other long-stay care facilities.
  - People who are in receipt of a carer's allowance, or those who are the main carer of an older or disabled person.
  - Household contacts of immunocompromised individuals.

The list above is not exhaustive, and the healthcare practitioner should apply clinical judgement to take into account the risk of flu exacerbating any underlying disease.

Expansion of national vaccination has created a greater need for timely information and reassurance on the balance of risks and benefits for those receiving the vaccines. The collaborative pilot study is conceived in response to the EU requirements triggered by the EMA's call for enhanced safety surveillance in Europe. The continuation of the pilot study in the 2016/17 season will help to build a framework for passive enhanced safety surveillance in England, but will also contribute to an EU-wide programme of enhanced safety surveillance for seasonal influenza vaccines.

## RESEARCH METHODS

This published protocol is a summary of the full protocol, submitted for ethical approval, the long version is available as a supplementary file.

### Objectives and endpoints

*Primary objective:*

- To estimate on a weekly basis the crude and cumulative incidence rate of AEs within 7 days following vaccination with a seasonal influenza vaccine, using passive surveillance of GP electronic health record (EHR) systems enhanced by a card-based ADR reporting system. Extracted data will be presented overall, by brand (Fluarix Tetra vs. others), by EMA defined age strata, and CMO- specified risk groups.

*Secondary objective:*

- To estimate on a weekly basis the vaccine uptake among the subjects registered in the enrolled GP practices, by age strata (6 months to 5 years; 6 to 12 years; 13 to 18 years;  $\geq 18-65$  years;  $>65$ ) and CMO-specified risk groups.

*Primary endpoints:*

- Occurrence and onset dates of AEs within 7 days post vaccination reported using a card based ADR reporting system in vaccinated patients overall, by brand (also indicating those for whom brand data are unavailable), by age strata (6 months to 5 years; 6 to 12 years; 13 to 17 years; 18-65 years;  $>65$ ) and CMO-specified risk groups. AEs will be presented by categories depending of the nature of the event.
  - Fever or other febrile illness
  - Local reactions
  - General reaction (e.g. fatigue, myalgia, etc.)

*Secondary endpoints:*

- Seasonal influenza vaccination status among the subjects registered in the enrolled GP practices, vaccine brand, by age strata (6 months to 5 years; 6 to 12 years; 13 to 18 years;  $\geq 18-65$  years;  $>65$ ) and CMO-specified risk groups and date of vaccine administration collected in the CMR system

## **Study Design**

*Study setting and population*

The proposed pilot study (EPI-FLU-046 VS UK) is to follow a cohort of patients who would be exposed to seasonal influenza vaccination in the months between 01/09/2016 and 30/11/2016. The final data collection will occur on 10/01/2017 to allow for any delays in records of up to 6 weeks.

Invitation letters will be sent to GP practices ordering mainly GSK's Fluarix Tetra vaccine for the 2016/17 season, and evenly representative of geographical locations and systems. Practices will be reimbursed for their involvement in this study, according to the National Institute of Health Research (NIHR) guidelines for industry sponsored studies<sup>6</sup>.

1  
2  
3  
4  
5  
6 For this pilot project, routinely collected primary care data from up to 10 GP practices will be  
7 extracted, to provide passive surveillance. However, this passive surveillance is enhanced by all  
8 practices additionally using a card-based ADR reporting system. In last year's study the card-  
9 based ADR reporting system, used the Yellow Card developed by the UK Medicines and  
10 Healthcare products Regulation Agency (MHRA). We have developed a more specific ADR card  
11 for use in this study, which will be distributed to practices. The new ADR card is pre-printed  
12 with the categories of likely AEs the EMA require surveillance for, to facilitate the recording of  
13 AEs and to make their coding into the GP EHR system easier. There was also a tick box for no  
14 AEI.  
15  
16  
17  
18

19 Patients will be provided with the appropriate ADR reporting card and invited to return the  
20 card to the GP practices within 7 days, but not later than 14 days, post-vaccination<sup>7</sup>. To protect  
21 confidentiality, this ADR card will be returned to the practice, and data from it will be  
22 recorded in that patient's EHR. The data will be used to estimate proportions of AEs among  
23 influenza-vaccinated individuals.  
24  
25  
26

#### 27 *Inclusion criteria*

28 All patients receiving a seasonal influenza vaccine between 01/09/2016 and 30/11/2016 in 1 of  
29 the 10 volunteer practices are eligible for inclusion in the analysis. The main inclusion criteria  
30 for practices is that they state their principal vaccine supplier will be GSK.  
31  
32  
33

#### 34 *Exclusion criteria*

35 Patients who have explicitly opted out of data sharing will be excluded from the analysis. We  
36 will identify these patients using the opt-out codes within GP information systems where the  
37 patients have made an explicit choice to opt out; patients will be informed of their option to  
38 opt-out via posters in the practices and information sheets accompanying the ADR cards.  
39  
40  
41

#### 42 *Sample size calculation*

43 The average practice size in England and Wales is 7,034<sup>8</sup>, and we estimate that data will be  
44 collected on a population of approximately 70,340 patients (across ten practices). In the period  
45 from September to December 2015, the seasonal influenza vaccine uptake for over 65 year  
46 olds was 71.0%; for those in a clinical risk group aged 6 months to 65 years old, the uptake  
47 was 45.1%; and for pregnant women, it was 42.3%. We have estimated influenza vaccine  
48 uptake using the coverage estimates published by Public Health England (PHE)<sup>9</sup>.  
49  
50  
51  
52

53 The minimum needed target population to be medically followed by the GPs is estimated at  
54 50,000 subjects (approximately 5,000 per practice). We expect to enrol at least 5,000  
55 vaccinated subjects with a 7 days of follow-up after vaccination (as per EMA interim guidance  
56  
57  
58  
59  
60

1  
2  
3  
4 request). This sample size estimation sets out to estimate the probability to observe at least  
5 one AEI in the study population and evaluate the level of “certainty” around this finding; this  
6 is over the 14 week period of enhanced surveillance (01 September – 30 November 2016)  
7  
8

9  
10 We have not taken into account any effect of clustering in our surveillance study design or  
11 power calculation. Similarities, or homogeneity, between subjects in clusters reduces the  
12 variability of their responses, compared with that expected from a random sample.  
13  
14  
15  
16  
17  
18  
19  
20  
21  
22  
23  
24  
25  
26  
27  
28  
29  
30  
31  
32  
33  
34  
35  
36  
37  
38  
39  
40  
41  
42  
43  
44  
45  
46  
47  
48  
49  
50  
51  
52  
53  
54  
55  
56  
57  
58  
59  
60

**Table 1 – Confidence intervals, Relative Standard Error and probability to observe at least one AEI according to expected probabilities of occurrence of AEI<sup>xx</sup>**

| Expected Population medically followed by the enrolled practices | Vaccine coverage | Vaccinated subjects | Subjects with events | Expected Proportion of subjects with $\geq 1$ AEI reported | Lower 95%CL | Upper 95%CL | Probability to observe $\geq 1$ AEI in the study population | Associated Relative standard error (RSE) |
|------------------------------------------------------------------|------------------|---------------------|----------------------|------------------------------------------------------------|-------------|-------------|-------------------------------------------------------------|------------------------------------------|
| 50000                                                            | 20%              | 10000               | 2000                 | 20,00%                                                     | 19,2%       | 20,8%       | 100,00%                                                     | 2,0%                                     |
| 50000                                                            | 20%              | 10000               | 1500                 | 15,00%                                                     | 14,3%       | 15,7%       | 100,00%                                                     | 2,4%                                     |
| 50000                                                            | 20%              | 10000               | 1000                 | 10,00%                                                     | 9,4%        | 10,6%       | 100,00%                                                     | 3,0%                                     |
| 50000                                                            | 20%              | 10000               | 500                  | 5,00%                                                      | 4,6%        | 5,4%        | 100,00%                                                     | 4,4%                                     |
| 50000                                                            | 20%              | 10000               | 400                  | 4,00%                                                      | 3,6%        | 4,4%        | 100,00%                                                     | 4,9%                                     |
| 50000                                                            | 20%              | 10000               | 200                  | 2,00%                                                      | 1,7%        | 2,3%        | 100,00%                                                     | 7,0%                                     |
| 50000                                                            | 20%              | 10000               | 100                  | 1,00%                                                      | 0,8%        | 1,2%        | 100,00%                                                     | 9,9%                                     |
| 50000                                                            | 20%              | 10000               | 10                   | 0,10%                                                      | 0,0%        | 0,2%        | 99,95%                                                      | 31,6%                                    |
| 50000                                                            | 20%              | 10000               | 9                    | 0,09%                                                      | 0,0%        | 0,2%        | 99,88%                                                      | 33,3%                                    |
| 50000                                                            | 20%              | 10000               | 8                    | 0,08%                                                      | 0,0%        | 0,2%        | 99,70%                                                      | 35,3%                                    |
| 50000                                                            | 20%              | 10000               | 7                    | 0,07%                                                      | 0,0%        | 0,1%        | 99,27%                                                      | 37,8%                                    |
| 50000                                                            | 20%              | 10000               | 6                    | 0,06%                                                      | 0,0%        | 0,1%        | 98,27%                                                      | 40,8%                                    |
| 50000                                                            | 20%              | 10000               | 5                    | 0,05%                                                      | 0,0%        | 0,1%        | 95,96%                                                      | 44,7%                                    |
| 50000                                                            | 20%              | 10000               | 4                    | 0,04%                                                      | 0,0%        | 0,1%        | 90,85%                                                      | 50,0%                                    |
| 50000                                                            | 20%              | 10000               | 3                    | 0,03%                                                      | 0,0%        | 0,1%        | 80,09%                                                      | 57,7%                                    |
| 50000                                                            | 20%              | 10000               | 2                    | 0,02%                                                      | 0,0%        | 0,1%        | 59,40%                                                      | 70,7%                                    |
| 50000                                                            | 20%              | 10000               | 1                    | 0,01%                                                      | 0,0%        | 0,1%        | 26,42%                                                      | 100,0%                                   |
| 50000                                                            | 10%              | 5000                | 250                  | 5,00%                                                      | 4,4%        | 5,6%        | 100,00%                                                     | 6,2%                                     |
| 50000                                                            | 10%              | 5000                | 200                  | 4,00%                                                      | 3,5%        | 4,6%        | 100,00%                                                     | 6,9%                                     |
| 50000                                                            | 10%              | 5000                | 100                  | 2,00%                                                      | 1,6%        | 2,4%        | 100,00%                                                     | 9,9%                                     |
| 50000                                                            | 10%              | 5000                | 50                   | 1,00%                                                      | 0,7%        | 1,3%        | 100,00%                                                     | 14,1%                                    |
| 50000                                                            | 10%              | 5000                | 5                    | 0,10%                                                      | 0,0%        | 0,2%        | 95,96%                                                      | 44,7%                                    |
| 50000                                                            | 10%              | 5000                | 4,5                  | 0,09%                                                      | 0,0%        | 0,2%        | 93,90%                                                      | 47,1%                                    |
| 50000                                                            | 10%              | 5000                | 4                    | 0,08%                                                      | 0,0%        | 0,2%        | 90,85%                                                      | 50,0%                                    |
| 50000                                                            | 10%              | 5000                | 3,5                  | 0,07%                                                      | 0,0%        | 0,2%        | 86,42%                                                      | 53,4%                                    |
| 50000                                                            | 10%              | 5000                | 3                    | 0,06%                                                      | 0,0%        | 0,2%        | 80,09%                                                      | 57,7%                                    |
| 50000                                                            | 10%              | 5000                | 2,5                  | 0,05%                                                      | 0,0%        | 0,2%        | 71,28%                                                      | 63,2%                                    |
| 50000                                                            | 10%              | 5000                | 2                    | 0,04%                                                      | 0,0%        | 0,1%        | 59,40%                                                      | 70,7%                                    |
| 50000                                                            | 10%              | 5000                | 1,5                  | 0,03%                                                      | 0,0%        | 0,1%        | 44,22%                                                      | 81,6%                                    |
| 50000                                                            | 10%              | 5000                | 1                    | 0,02%                                                      | 0,0%        | 0,1%        | 26,42%                                                      | 100,0%                                   |
| 50000                                                            | 10%              | 5000                | 0,5                  | 0,01%                                                      | 0,0%        | 0,1%        | 9,02%                                                       | 141,4%                                   |
| 50000                                                            | 5%               | 2500                | 125                  | 5,00%                                                      | 4,2%        | 5,9%        | 100,00%                                                     | 8,7%                                     |
| 50000                                                            | 5%               | 2500                | 100                  | 4,00%                                                      | 3,3%        | 4,8%        | 100,00%                                                     | 9,8%                                     |
| 50000                                                            | 5%               | 2500                | 50                   | 2,00%                                                      | 1,5%        | 2,6%        | 100,00%                                                     | 14,0%                                    |
| 50000                                                            | 5%               | 2500                | 25                   | 1,00%                                                      | 0,6%        | 1,5%        | 100,00%                                                     | 19,9%                                    |
| 50000                                                            | 5%               | 2500                | 12,5                 | 0,50%                                                      | 0,3%        | 0,9%        | 100,00%                                                     | 28,2%                                    |
| 50000                                                            | 5%               | 2500                | 2,5                  | 0,10%                                                      | 0,0%        | 0,3%        | 71,29%                                                      | 63,2%                                    |
| 50000                                                            | 5%               | 2500                | 2,25                 | 0,09%                                                      | 0,0%        | 0,3%        | 65,76%                                                      | 66,6%                                    |
| 50000                                                            | 5%               | 2500                | 2                    | 0,08%                                                      | 0,0%        | 0,3%        | 59,41%                                                      | 70,7%                                    |
| 50000                                                            | 5%               | 2500                | 1,75                 | 0,07%                                                      | 0,0%        | 0,3%        | 52,22%                                                      | 75,6%                                    |
| 50000                                                            | 5%               | 2500                | 1,5                  | 0,06%                                                      | 0,0%        | 0,3%        | 44,22%                                                      | 81,6%                                    |
| 50000                                                            | 5%               | 2500                | 1,25                 | 0,05%                                                      | 0,0%        | 0,3%        | 35,54%                                                      | 89,4%                                    |
| 50000                                                            | 5%               | 2500                | 1                    | 0,04%                                                      | 0,0%        | 0,2%        | 26,42%                                                      | 100,0%                                   |
| 50000                                                            | 5%               | 2500                | 0,75                 | 0,03%                                                      | 0,0%        | 0,2%        | 17,33%                                                      | 115,5%                                   |
| 50000                                                            | 5%               | 2500                | 0,5                  | 0,02%                                                      | 0,0%        | 0,2%        | 9,02%                                                       | 141,4%                                   |
| 50000                                                            | 5%               | 2500                | 0,25                 | 0,01%                                                      | 0,0%        | 0,2%        | 2,65%                                                       | 200,0%                                   |

1  
2  
3  
4 The cluster effect has not been taken into consideration in the calculation of the sample  
5 size. It may increase the relative standard error and thus decrease the precision around the  
6 proportions presented below. Nevertheless, this will be accounted for during the analysis.  
7  
8

9  
10 Table 1 shows the 95% CI, the probability of observing at least one AEI during the study period  
11 in the study cohort and the relative standard error (RSE) for a range of scenarios in term of  
12 cohort size, vaccine coverage and expected probability of AEI<sup>10</sup>. With an overall sample size of  
13 a minimum of about 50,000 subjects medically followed by the enrolled GP practices, a  
14 follow-up period of 14 weeks, a vaccine coverage of 5%, 10% or 20% and an expected  
15 probability of AEI varying from 0,01% to 20%, the corresponding probability to observe at  
16 least one event in our study population varies from 2% to 100%, and the associated relative  
17 standard error varies from 2.0% to 200% depending on the scenario.  
18  
19  
20

21  
22 Table 2 shows the evolution by week of the 95% CI, the cumulative probability of observing at  
23 least one AEI in the study cohort and the relative standard error (RSE) in the course of the  
24 study for a range of scenarios in term of cohort size, vaccine coverage and probability of AEI of  
25 1%. With an overall sample size of a minimum of about 50,000 subjects medically followed by  
26 the enrolled GP practices, a follow-up period of 14 weeks, a vaccine coverage of 5%, 10% or  
27 20%, the corresponding probability to observe at least one event in our study population  
28 varies from 53% to 99% after week 1, and the associated relative standard error varies from  
29 53% to 37% depending on the scenario.  
30  
31  
32  
33  
34  
35  
36  
37  
38  
39  
40  
41  
42  
43  
44  
45  
46  
47  
48  
49  
50  
51  
52  
53  
54  
55  
56  
57  
58  
59  
60

**Table 2 – Confidence intervals, Relative Standard Error cumulative probability to observe at least one AEI by week associated with a probability of occurrence of event of 1%**

| Week | Expected Population medically followed by the enrolled practices | Cumulative Vaccine coverage after 14 weeks | Cumulative number of Vaccinated subjects | Cumulative number of Subjects reported $\geq 1$ AEI | Average Proportion of AEI reported | Lower 95%CL | Upper 95%CL | Cumulative Probability to observe at least one event | Associated Relative standard error (RSE) |
|------|------------------------------------------------------------------|--------------------------------------------|------------------------------------------|-----------------------------------------------------|------------------------------------|-------------|-------------|------------------------------------------------------|------------------------------------------|
| 1    | 50000                                                            | 20%                                        | 714                                      | 7                                                   | 1,00%                              | 0,4%        | 2,0%        | 99,37%                                               | 37,2%                                    |
| 2    | 50000                                                            | 20%                                        | 1428                                     | 14                                                  | 1,00%                              | 0,5%        | 1,6%        | 100,00%                                              | 26,3%                                    |
| 3    | 50000                                                            | 20%                                        | 2142                                     | 21                                                  | 1,00%                              | 0,6%        | 1,5%        | 100,00%                                              | 21,5%                                    |
| 4    | 50000                                                            | 20%                                        | 2857                                     | 28                                                  | 1,00%                              | 0,7%        | 1,4%        | 100,00%                                              | 18,6%                                    |
| 5    | 50000                                                            | 20%                                        | 3571                                     | 35                                                  | 1,00%                              | 0,7%        | 1,4%        | 100,00%                                              | 16,7%                                    |
| 6    | 50000                                                            | 20%                                        | 4285                                     | 42                                                  | 1,00%                              | 0,7%        | 1,3%        | 100,00%                                              | 15,2%                                    |
| 7    | 50000                                                            | 20%                                        | 5000                                     | 50                                                  | 1,00%                              | 0,7%        | 1,3%        | 100,00%                                              | 14,1%                                    |
| 8    | 50000                                                            | 20%                                        | 5714                                     | 57                                                  | 1,00%                              | 0,8%        | 1,3%        | 100,00%                                              | 13,2%                                    |
| 9    | 50000                                                            | 20%                                        | 6428                                     | 64                                                  | 1,00%                              | 0,8%        | 1,3%        | 100,00%                                              | 12,4%                                    |
| 10   | 50000                                                            | 20%                                        | 7142                                     | 71                                                  | 1,00%                              | 0,8%        | 1,3%        | 100,00%                                              | 11,8%                                    |
| 11   | 50000                                                            | 20%                                        | 7857                                     | 78                                                  | 1,00%                              | 0,8%        | 1,2%        | 100,00%                                              | 11,2%                                    |
| 12   | 50000                                                            | 20%                                        | 8571                                     | 85                                                  | 1,00%                              | 0,8%        | 1,2%        | 100,00%                                              | 10,7%                                    |
| 13   | 50000                                                            | 20%                                        | 9285                                     | 92                                                  | 1,00%                              | 0,8%        | 1,2%        | 100,00%                                              | 10,3%                                    |
| 14   | 50000                                                            | 20%                                        | 10000                                    | 100                                                 | 1,00%                              | 0,8%        | 1,2%        | 100,00%                                              | 9,9%                                     |
| 1    | 50000                                                            | 10%                                        | 357                                      | 3                                                   | 1,00%                              | 0,2%        | 2,4%        | 87,26%                                               | 52,7%                                    |
| 2    | 50000                                                            | 10%                                        | 714                                      | 7                                                   | 1,00%                              | 0,4%        | 2,0%        | 99,37%                                               | 37,2%                                    |
| 3    | 50000                                                            | 10%                                        | 1071                                     | 10                                                  | 1,00%                              | 0,4%        | 1,7%        | 99,98%                                               | 30,4%                                    |
| 4    | 50000                                                            | 10%                                        | 1428                                     | 14                                                  | 1,00%                              | 0,5%        | 1,6%        | 100,00%                                              | 26,3%                                    |
| 5    | 50000                                                            | 10%                                        | 1785                                     | 17                                                  | 1,00%                              | 0,6%        | 1,5%        | 100,00%                                              | 23,6%                                    |
| 6    | 50000                                                            | 10%                                        | 2142                                     | 21                                                  | 1,00%                              | 0,6%        | 1,5%        | 100,00%                                              | 21,5%                                    |
| 7    | 50000                                                            | 10%                                        | 2500                                     | 25                                                  | 1,00%                              | 0,6%        | 1,5%        | 100,00%                                              | 19,9%                                    |
| 8    | 50000                                                            | 10%                                        | 2857                                     | 28                                                  | 1,00%                              | 0,7%        | 1,4%        | 100,00%                                              | 18,6%                                    |
| 9    | 50000                                                            | 10%                                        | 3214                                     | 32                                                  | 1,00%                              | 0,7%        | 1,4%        | 100,00%                                              | 17,6%                                    |
| 10   | 50000                                                            | 10%                                        | 3571                                     | 35                                                  | 1,00%                              | 0,7%        | 1,4%        | 100,00%                                              | 16,7%                                    |
| 11   | 50000                                                            | 10%                                        | 3928                                     | 39                                                  | 1,00%                              | 0,7%        | 1,4%        | 100,00%                                              | 15,9%                                    |
| 12   | 50000                                                            | 10%                                        | 4285                                     | 42                                                  | 1,00%                              | 0,7%        | 1,3%        | 100,00%                                              | 15,2%                                    |
| 13   | 50000                                                            | 10%                                        | 4642                                     | 46                                                  | 1,00%                              | 0,7%        | 1,3%        | 100,00%                                              | 14,6%                                    |
| 14   | 50000                                                            | 10%                                        | 5000                                     | 50                                                  | 1,00%                              | 0,7%        | 1,3%        | 100,00%                                              | 14,1%                                    |
| 1    | 50000                                                            | 5%                                         | 178                                      | 1                                                   | 1,00%                              | 0,0%        | 3,1%        | 53,24%                                               | 74,6%                                    |
| 2    | 50000                                                            | 5%                                         | 357                                      | 3                                                   | 1,00%                              | 0,2%        | 2,4%        | 87,26%                                               | 52,7%                                    |
| 3    | 50000                                                            | 5%                                         | 535                                      | 5                                                   | 1,00%                              | 0,3%        | 2,2%        | 97,04%                                               | 43,0%                                    |
| 4    | 50000                                                            | 5%                                         | 714                                      | 7                                                   | 1,00%                              | 0,4%        | 2,0%        | 99,37%                                               | 37,2%                                    |
| 5    | 50000                                                            | 5%                                         | 892                                      | 8                                                   | 1,00%                              | 0,4%        | 1,8%        | 99,87%                                               | 33,3%                                    |
| 6    | 50000                                                            | 5%                                         | 1071                                     | 10                                                  | 1,00%                              | 0,4%        | 1,7%        | 99,98%                                               | 30,4%                                    |
| 7    | 50000                                                            | 5%                                         | 1250                                     | 12                                                  | 1,00%                              | 0,5%        | 1,7%        | 100,00%                                              | 28,1%                                    |
| 8    | 50000                                                            | 5%                                         | 1428                                     | 14                                                  | 1,00%                              | 0,5%        | 1,6%        | 100,00%                                              | 26,3%                                    |
| 9    | 50000                                                            | 5%                                         | 1607                                     | 16                                                  | 1,00%                              | 0,6%        | 1,6%        | 100,00%                                              | 24,8%                                    |
| 10   | 50000                                                            | 5%                                         | 1785                                     | 17                                                  | 1,00%                              | 0,6%        | 1,5%        | 100,00%                                              | 23,6%                                    |
| 11   | 50000                                                            | 5%                                         | 1964                                     | 19                                                  | 1,00%                              | 0,6%        | 1,5%        | 100,00%                                              | 22,5%                                    |
| 12   | 50000                                                            | 5%                                         | 2142                                     | 21                                                  | 1,00%                              | 0,6%        | 1,5%        | 100,00%                                              | 21,5%                                    |
| 13   | 50000                                                            | 5%                                         | 2321                                     | 23                                                  | 1,00%                              | 0,6%        | 1,5%        | 100,00%                                              | 20,7%                                    |
| 14   | 50000                                                            | 5%                                         | 2500                                     | 25                                                  | 1,00%                              | 0,6%        | 1,5%        | 100,00%                                              | 19,9%                                    |

#### Data sources

In this passive enhanced safety surveillance, there are two data sources. General practice EHR data, providing passive surveillance, with ADR cards completed by patients providing the



1  
2  
3  
4 enhanced component. The ADR cards are being returned to the patient's own practice to  
5 ensure confidentiality. The data from these cards would also be coded into the EHR and  
6 uploaded weekly (Figure 1).  
7  
8

9  
10 *Figure 1 – Data capture flowchart*  
11

- 12 1. General Practice EHR data recorded by the practice team. Weekly data about vaccine  
13 exposure, and any subsequent AEs will be uploaded (anonymised) to the University of  
14 Surrey. The EHR data contains both AEs recorded by the practice team, as well as  
15 data reported to the practice on an ADR by a vaccinated patient.  
16  
17
- 18 2. ADR cards completed by patients. Among the 10 participating GP practices, patients  
19 who are vaccinated against influenza will be provided ADR cards. These ADR cards,  
20 customised following practice feedback to match EMA requirements, to collect AEs  
21 reported after the receipt of influenza vaccination.  
22  
23  
24  
25

26 These data, originating from the two sources (patient completed ADR card, or practice  
27 recorded) will be then imported (anonymised) into the secure servers of the University of  
28 Surrey. The final dataset will therefore combine data routinely collected for all patients  
29 registered with the 10 participating sites and data collected from the ADR cards and encoded  
30 during the 2016/17 influenza season. In addition to the adverse event data, we will extract  
31 demographics, vaccination status, and relevant comorbidities.  
32  
33  
34

35 We will only extract coded data, i.e. where the GP or other health professional codes a disease  
36 or symptom into the EHR system<sup>11</sup>. The overwhelming majority of the large volume of  
37 research that has come out of UK primary care is based on coded data<sup>12</sup>. The richness of  
38 primary care data are such that we anticipate being able to detect important AEs<sup>13</sup>. We will  
39 request practices to use the relevant Read code for ADR notifications, when recording data  
40 from a returned card (Read Code: 9G4 Adverse drug reaction notification).  
41  
42  
43  
44

#### 45 **Data analyses**

46 We will interpret coded data by the creation of ontologies that we will map to case-  
47 definitions, where available. However, we do not have the in depth descriptions required for  
48 case definition found, for example, in clinical trials. We will be inferring meaning from brief  
49 clinical coded information, though we have considerable experience of this and will have the  
50 opportunity to confirm with practices and practitioners how to interpret their clinical records.  
51  
52  
53

54 Statistical analysis will consist primarily of descriptive statistics: rates and proportions for  
55 categorical data and summary statistics for continuous variables. Confidence intervals will be  
56  
57  
58  
59  
60



1  
2  
3  
4 calculated; however, due to the effects of clustering and practice differences in this  
5 relatively small pilot these are likely to be wide. All statistical analysis will be conducted using  
6 R Studio.  
7  
8

#### 9 10 *Analyses of the primary objective*

11 All analyses will be carried out by overall, by brand (Fluarix tetra vs. others), by age strata (6  
12 months to 5 years; 6 to 12 years; 13 to 17 years; 18-65 years; >65), and CMO-specified risk  
13 groups.  
14

15 To estimate on a weekly basis the crude incidence rate of AEs within 7 days

- 16 o The denominator will consist of the number vaccinated subjects receiving a vaccination  
17 card and reaching 7 days of follow-up post vaccination during the week of interest and  
18 cumulatively since the beginning of the study.
- 19 o The numerator will encompass all vaccinated subjects reporting at least one AEI within  
20 7 days following vaccination with a seasonal influenza vaccine  
21  
22  
23

## 24 **ETHICS AND DISSEMINATION**

### 25 *Ethical review*

26  
27  
28 'Defining Research' (<http://www.hra.nhs.uk/documents/2013/09/defining-research.pdf>), the  
29 National Research Ethics Service (NRES) guidance suggests that surveillance does not require  
30 formal review by a Research Ethics Committee. The research team will however sought an  
31 opinion from the NRES's Proportional Review system to check if formal approval from a NHS  
32 Research Ethics Committee (REC) is needed prior to the commencement of the study, as well  
33 as Section 251 approval. Ethical approval was granted by the Proportionate Review Sub-  
34 committee of the North East - Newcastle & North Tyneside 2 REC on 05/08/2016 (REC  
35 reference: 16/NE/0271). Section 251 application was not deemed necessary by the Health  
36 Research Authority (HRA) and the study received approval on 01/09/2016 (IRAS ID: 211560).  
37  
38  
39  
40  
41

### 42 *Data extraction and data management*

43 The method and governance procedure has been developed by the University of Surrey, using  
44 an approved provider, Apollo Medical Software Solutions Ltd. Alternatively, we will use  
45 another approved data extraction supplier, or securely extract the relevant study data  
46 ourselves using standard data extraction tools such as Morbidity Information Query Export  
47 Syntax (MIQUEST), a Department of Health sponsored data extract tool. Data extractions will  
48 be conducted in accordance with the Research Group's standard operating procedures in  
49 data extraction, pseudonymisation, and transfer.  
50  
51  
52

53  
54 All data are strongly encrypted by a combination of symmetric and asymmetric encryption  
55  
56  
57  
58  
59  
60

1  
2  
3  
4 algorithms: Triple DES<sup>1</sup> and RSA 1024<sup>2</sup> before transmission, and utilises public and private  
5 key pairs unique to each project. Data are pseudonymised as near to source as possible.  
6 Pseudonymisation is applied at this stage to allow for backwards identification should there be  
7 a need to do so as part of an ethically approved study.  
8  
9

10  
11 Pseudonymisation is a process that involves the removal of all personal identifiers from data  
12 – such as name, date of birth, etc. However, there is a risk that if data are linked to other  
13 data a person might be identified<sup>14</sup>. Therefore although all identifiers are removed we keep  
14 data encrypted during transfer and on a secure network that meets NHS Information  
15 Governance standards to minimise the risk of re-identification. Pseudonymisation is the  
16 standard approach for this type of surveillance. A legally binding definition of  
17 pseudonymisation has been introduced into European law<sup>15</sup> on the recommendation of the  
18 European Data Protection Supervisor (EDPS)<sup>16</sup>.  
19  
20  
21  
22

23 All data processing and analysis in the present proposed study will be conducted within the  
24 secure IT environment of the Clinical Informatics Research Group, at the University of Surrey.  
25 The information security policies and procedures of the Research Group have been approved  
26 by the NHS Health and Social Care Information Centre (HSCIC) as meeting Information  
27 Governance Toolkit (IGT) standards<sup>17</sup>. The University of Surrey is registered with the  
28 Information Commissioner's Office Data Protection Register, and is compliant with the Data  
29 Protection Act, and other legislations.  
30  
31  
32  
33

34 In line with the principle of the Data Protection Act 1998, data subjects will be informed of  
35 the uses of their data in this study. Participating GP practices will be asked to display project  
36 information in their website, and project information posters in reception areas, from when  
37 the practice has consented to take part in the study and until the study is completed. We will  
38 respect the codes in the data indicating that a patient does not wish to have their record  
39 available for research; we will, however, seek to report the number of patients within a  
40 practice who have chosen to opt out.  
41  
42  
43  
44

45 No Personally Identifiable Information (PII) such as NHS numbers, postcodes, dates of birth,  
46 etc. will be available to GSK, third parties, or disclosed in publications. Additionally, no patient  
47 level data will be sent to GSK to remove any possibility that any individual patient might be re-  
48 identified. GSK will also be blinded to practice identities, and the locality at which any AEI  
49 occurs; other than where the patient gives consent, or their own chooses to report any  
50  
51  
52

53  
54 <sup>1</sup> This is also referred to as "3DES", which is the commonly used name for the triple data encryption algorithm  
55 (TDEA, also written Triple DEA) symmetric-key block cipher.

56 <sup>2</sup> RSA stands for Rivest, Shamir and Aldeman who founded RSA Laboratories. They created large numbers with only  
57 two prime factors, a core component of the encryption process.  
58  
59  
60

1  
2  
3  
4 condition in line with best practice.  
5  
6

#### 7 *Safety reporting, including routine pharmacovigilance*

8 This study's primary endpoints are safety-related. However, it will be clearly communicated to  
9 participating practices that the study does not replace AEI reporting that would occur as part  
10 of routine practice. If a GP felt an AEI merited reporting they should do so in whatever way  
11 they would generally do so. If the team at the University of Surrey becomes aware of a serious  
12 adverse event (SAE) experienced by a study participant, the SAE should be reported to GSK  
13 within 24 hours of awareness, in writing. An SAE is defined as any untoward medical  
14 occurrence that:  
15  
16  
17

- 18 • Results in death,
- 19 • Life-threatening (where the participant is at risk of death),
- 20 • Requires hospitalization or prolongation of existing hospitalization,
- 21 • Results in disability/incapacity (where there is a substantial disruption of a person's  
22 ability to conduct normal life functions).
- 23 • Important medical events -events that may not be immediately life-threatening or  
24 result in death or hospitalization but may jeopardize the study participant or may  
25 require medical or surgical intervention to prevent one of the other outcomes listed in  
26 the above definition.  
27  
28  
29  
30  
31  
32

#### 33 *Dissemination and Public Register Disclosure*

34 The outputs from the research will be disseminated primarily through peer review papers in  
35 high impact journals within the domains of primary care, surveillance, vaccines, and infectious  
36 diseases<sup>18 19</sup>. We will present findings at relevant seminars and conferences. The University of  
37 Surrey, in accordance with GSK policy, will post a summary of the study protocol and results  
38 within 12 months of study completion and following review and comment by GSK on GSK's  
39 Clinical Study Register, accessible at <http://www.gsk-clinicalstudyregister.com> and at  
40 [www.clinicaltrials.gov](http://www.clinicaltrials.gov).  
41  
42  
43  
44

#### 45 **AUTHOR CONTRIBUTIONS**

##### 46 **SdeL**

47 Simon de Lusignan developed the study design, and is the main writer of the protocol.  
48  
49  
50  
51

##### 52 **GDS**

53 Gaël Dos Santos helped with the study design development, and contributed to the writing.  
54  
55

##### 56 **AC**

1  
2  
3  
4 Ana Correa contributed to the methods and analysis section of this protocol.  
5  
6

7 **FH**

8 François Haguinet contributed to the sample size and analysis section of this protocol.  
9  
10

11 **IY**

12 Ivelina Yonova helped develop the practice recruitment methods, and contributed to writing  
13 the protocol.  
14  
15

16 **FL**

17 Florence Lair reviewed the protocol, and contributed to the writing.  
18  
19

20 **RB**

21 Rachel Byford helped develop the data flow structure, and contributed to writing the protocol.  
22  
23

24 **FF**

25 Filipa Ferreira extensively reviewed the protocol, and contributed to the writing.  
26  
27

28 **KS**

29 Karen Stuttard reviewed the protocol, and contributed to the writing.  
30  
31

32 **TC**

33 Tom Chan contributed to the ethical implications and background section of this protocol.  
34  
35  
36

37 **FUNDING STATEMENT**

38 GlaxoSmithKline Biologicals SA was the funding source and was involved in study design and  
39 interpretation, study number 202056.  
40  
41

42 **COMPETING INTERESTS STATEMENT**

43 SdeL and AC participate in a European consortium called IMOVE+ funded by Horizon 2020 to  
44 monitor seasonal influenza vaccine effectiveness across Europe.  
45  
46

47 GDS reports he was employed by Business & Decision Life Sciences on behalf of GSK Vaccines  
48 at the time of the study and is now employed by the GSK group of companies. NM and FH are  
49 employees of the GSK group of companies. GDS and NM hold shares in the GSK group of  
50 companies as part of their employee remuneration.  
51  
52

53 **DATA SHARING STATEMENT**

54  
55 Once the study is completed, we will publish all relevant aggregated results. Unpublished  
56  
57  
58  
59  
60

1  
2  
3  
4 aggregated results could be made available, upon request, by the authors.  
5  
6  
7  
8  
9  
10  
11  
12  
13  
14  
15  
16  
17  
18  
19  
20  
21  
22  
23  
24  
25  
26  
27  
28  
29  
30  
31  
32  
33  
34  
35  
36  
37  
38  
39  
40  
41  
42  
43  
44  
45  
46  
47  
48  
49  
50  
51  
52  
53  
54  
55  
56  
57  
58  
59  
60

For peer review only

## REFERENCES

- <sup>1</sup> European Medicines Agency (EMA) Pharmacovigilance Risk Assessment Committee (PRAC). Interim guidance on enhanced safety surveillance for seasonal influenza vaccines in the EU. London, EMA: Ref: EMA/PRAC/222346/2014; 10 April 2014. URL: [http://www.ema.europa.eu/docs/en\\_GB/document\\_library/Scientific\\_guideline/2014/04/WC500165492.pdf](http://www.ema.europa.eu/docs/en_GB/document_library/Scientific_guideline/2014/04/WC500165492.pdf)
- <sup>2</sup> European Medicines Agency (EMA). Explanatory note on the withdrawal of the note for guidance on harmonization of requirements for influenza vaccines and of the core SmPC/PL for inactivated seasonal influenza vaccines. London: EMA; 2014. Contract No.: EMA/CHMP/VWP/40560/2014. Available from: [http://www.ema.europa.eu/ema/index.jsp?curl=pages/includes/document/document\\_detail.jsp?webContentId=WC500161022&mid=WC0b01ac058009a3dc](http://www.ema.europa.eu/ema/index.jsp?curl=pages/includes/document/document_detail.jsp?webContentId=WC500161022&mid=WC0b01ac058009a3dc)
- <sup>3</sup> Correa, A., Hinton, W., McGovern, A., van Vlymen, J., Yonova, I., Jones, S., de Lusignan, S. Cohort profile: Royal College of General Practitioners Research and Surveillance Centre (RCGP RSC) sentinel network. *BMJ Open* 2016;6:e011092. doi:10.1136/bmjopen-2016-011092
- <sup>4</sup> Royal College of General Practitioners (RCGP) Research and Surveillance Centre (RSC). URL: <http://www.rcgp.org.uk/clinical-and-research/our-programmes/research-and-surveillance-centre.aspx>
- <sup>5</sup> Public Health England, Department of Health, NHS England. Flu plan Winter 2015/16. 2015. PHE publications gateway number: 2014833. URL: [https://www.gov.uk/government/uploads/system/uploads/attachment\\_data/file/418038/Flu\\_Plan\\_Winter\\_2015\\_to\\_2016.pdf](https://www.gov.uk/government/uploads/system/uploads/attachment_data/file/418038/Flu_Plan_Winter_2015_to_2016.pdf)
- <sup>6</sup> National Institute for Health Research Clinical Research Network. Guide to the NIHR CRN Industry Costing Template: Costing Industry Sponsored Studies (version: April 2014). URL: <https://www.crn.nihr.ac.uk/wp-content/uploads/Industry/GUIDE%20to%20Industry%20Costing%20Template-APRIL2014.pdf>
- <sup>7</sup> David A. Asch M.Kathryn Jedrzejewski, Nicholas A. Christakis, Response rates to mail surveys published in medical journals *Journal of Clinical Epidemiology* Volume 50, Issue 10, October 1997, Pages 1129–1136
- <sup>8</sup> Workforce and Facilities Team, Health and Social Care Information Centre. General and Personal Medical Services: England 2003-13. 25 March 2014. URL: <http://www.hscic.gov.uk/catalogue/PUB13849/nhs-staf-2003-2013-gene-prac-rep.pdf>
- <sup>9</sup> Public Health England. Vaccine uptake guidance and the latest coverage data. <https://www.gov.uk/government/collections/vaccine-uptake#seasonal-flu-vaccine-uptake>
- <sup>10</sup> Clopper CJ, Pearson ES. The use of confidence or fiducial limits illustrated in the case of binomial. *Biometrika*. 1934; 26:404-413
- <sup>11</sup> de Lusignan S. Codes, classifications, terminologies and nomenclatures: definition, development and application in practice. *Inform Prim Care*. 2005;13(1):65-70.
- <sup>12</sup> Kousoulis AA, Rafi I, de Lusignan S. The CPRD and the RCGP: building on research success by enhancing benefits for patients and practices. *Br J Gen Pract*. 2015 Feb;65(631):54-5. doi: 10.3399/bjgp15X683353.
- <sup>13</sup> de Lusignan S, van Weel C. The use of routinely collected computer data for research in primary care: opportunities and challenges. *Fam Pract*. 2006;23(2):253-63.
- <sup>14</sup> National Health Service (NHS). Pseudonymisation and anonymisation of data policy (last reviewed: 27 April 2015), accessed 09/06/2016. URL: [http://www.google.fr/url?url=http://www.nhsbsa.nhs.uk/Documents/NHSBSACorporatePoliciesandProcedures/Pseudonymisation\\_and\\_Anonymisation\\_of\\_Data\\_Policy.doc&rct=j&frm=1&q=&esrc=s&sa=U&ved=0ahUKewjZrQpVz4fNAhWEB8AKHU0IBz4QFggUMAA&usg=AFQjCNF-JPX5zueirRIBylzoF-WAEDNkmg](http://www.google.fr/url?url=http://www.nhsbsa.nhs.uk/Documents/NHSBSACorporatePoliciesandProcedures/Pseudonymisation_and_Anonymisation_of_Data_Policy.doc&rct=j&frm=1&q=&esrc=s&sa=U&ved=0ahUKewjZrQpVz4fNAhWEB8AKHU0IBz4QFggUMAA&usg=AFQjCNF-JPX5zueirRIBylzoF-WAEDNkmg)
- <sup>15</sup> European Union. Justice. Reform of EU data protection rules. URL: [http://ec.europa.eu/justice/data-protection/reform/index\\_en.htm](http://ec.europa.eu/justice/data-protection/reform/index_en.htm)
- <sup>16</sup> EUR-lex. EDPS recommendations on the EU's options for data protection reform. URL: [http://eur-lex.europa.eu/legal-content/EN/TXT/?uri=CELEX%3A52015XX0912\(01\)#ntc14-C\\_2015301EN.01000101-E0014](http://eur-lex.europa.eu/legal-content/EN/TXT/?uri=CELEX%3A52015XX0912(01)#ntc14-C_2015301EN.01000101-E0014)
- <sup>17</sup> Health and Social Care Information Centre (HSCIC). Information Governance Toolkit (IGT). URL: <https://www.igt.hscic.gov.uk/>
- <sup>18</sup> MRC Policy and Guidance on Sharing of Research Data from Population and Patient Studies (Sept 2011) <http://www.mrc.ac.uk/Ourresearch/Ethicsresearchguidance/datasharing/Policy/index.htm>
- <sup>19</sup> Economic Co-operation and Development (OECD). "Promoting Access to Public Research Data for Scientific, Economic and Social Development" 2007 <http://www.oecd.org/sti/sci-tech/38500813.pdf>

Flow chart 4: Data capture flow chart – patient flu vaccinated in the surgery

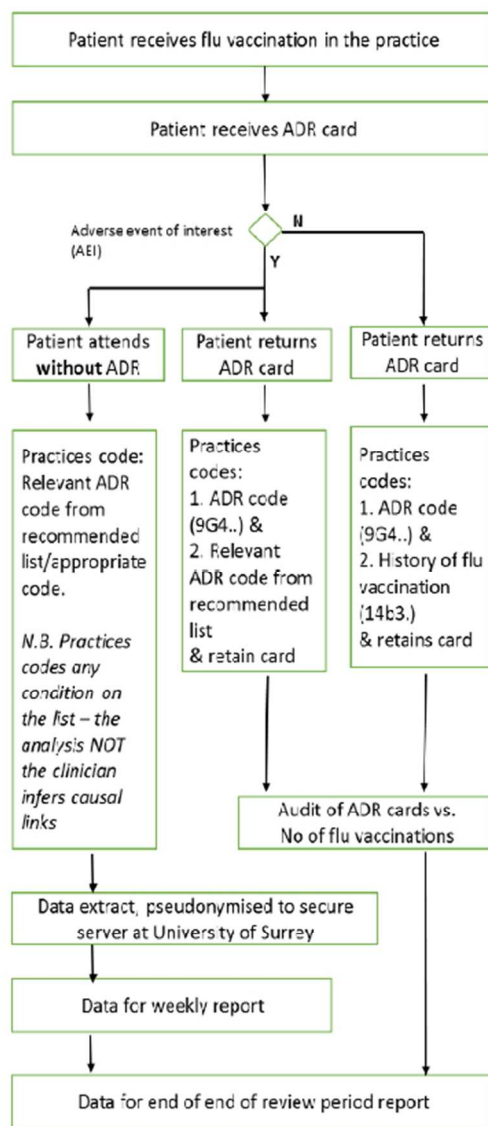

156x231mm (96 x 96 DPI)
